1 **Full Title:** Colocalization of expression transcripts with COVID-19 outcomes is rare across cell states, cell types  
2 and organs.

3 **Short Title:** Factors influencing colocalization of gene expression with COVID-19 outcomes.

4 **Authors:** Julian Daniel Sunday Willett<sup>1,2,3</sup>, Tianyuan Lu<sup>1,2,3</sup>, Tomoko Nakanishi<sup>1,2,4,5,6</sup>, Satoshi Yoshiji<sup>1,2,4,5,6</sup>,  
5 Guillaume Butler-Laporte<sup>1</sup>, Sirui Zhou<sup>1,2</sup>, Yossi Farjoun<sup>1</sup>, J. Brent Richards<sup>1,2,8,9,10</sup>

6  
7 **Corresponding author:**

8 Brent Richards

9 [brent.richards@mcgill.ca](mailto:brent.richards@mcgill.ca)

10 Pavillon H-413, Jewish General Hospital

11 3755 Cote Ste Catherine

12 Montreal, QC, Canada, H3T 1E2

13

14 **Affiliations:**

15 1. Centre for Clinical Epidemiology, Department of Medicine, Lady Davis Institute, Jewish General Hospital,  
16 McGill University, Montréal, Québec, Canada.

17 2. McGill University, Montreal, Quebec, Canada

18 3. Quantitative Life Sciences Program, McGill University, Montreal, Quebec, Canada

19 4. Department of Human Genetics, McGill University, Montreal, Quebec, Canada

20 5. Kyoto-McGill International Collaborative Program in Genomic Medicine, Graduate School of Medicine,  
21 Kyoto University, Kyoto, Japan

22 6. Research Fellow, Japan Society for the Promotion of Science, Tokyo, Japan.

23 7. Genome Centre, McGill University, Montreal, Quebec, Canada

24 8. Departments of Medicine, Human Genetics, Epidemiology and Biostatistics, McGill University, Montréal,  
25 Quebec, Canada

26 9. Department of Twin Research, King's College London, London, United Kingdom

27 10. Five Prime Sciences Inc, Montréal, Québec, Canada

28

*Colocalization of expression transcripts with COVID-19 outcomes is dependent on cell-type and cell-state.*

29 **Abstract:**

30 Identifying causal genes at GWAS loci can help pinpoint targets for therapeutic interventions. Expression  
31 studies can disentangle such loci but signals from expression quantitative trait loci (eQTLs) often fail to  
32 colocalize—which means that the genetic control of measured expression is not shared with the genetic control of  
33 disease risk. This may be because gene expression is measured in the wrong cell type, physiological state, or organ.  
34 We tested whether Mendelian randomization (MR) could identify genes at loci influencing COVID-19 outcomes  
35 and whether the colocalization of genetic control of expression and COVID-19 outcomes was influenced by cell  
36 type, cell stimulation, and organ.

37 We conducted MR of *cis*-eQTLs from single cell (scRNA-seq) and bulk RNA sequencing. We then tested  
38 variables that could influence colocalization, including cell type, cell stimulation, RNA sequencing modality, organ,  
39 symptoms of COVID-19, and SARS-CoV-2 status among individuals with symptoms of COVID-19. The outcomes  
40 used to test colocalization were COVID-19 severity and susceptibility as assessed in the Host Genetics Initiative  
41 release 7.

42 Most transcripts identified using MR did not colocalize when tested across cell types, cell state and in  
43 different organs. Most that did colocalize likely represented false positives due to linkage disequilibrium. In general,  
44 colocalization was highly variable and at times inconsistent for the same transcript across cell type, cell stimulation  
45 and organ. While we identified factors that influenced colocalization for select transcripts, identifying 33 that  
46 mediate COVID-19 outcomes, our study suggests that colocalization of expression with COVID-19 outcomes is  
47 partially due to noisy signals even after following quality control and sensitivity testing. These findings illustrate the  
48 present difficulty of linking expression transcripts to disease outcomes and the need for skepticism when observing  
49 eQTL MR results, even accounting for cell types, stimulation state and different organs.

50

51 **Author Summary:** The genetic determinants of disease and gene expression often do not colocalize (which means  
52 they do not share a single causal signal). While some researchers have identified factors that could explain this  
53 disconnect, such as immune stimulation or tissue studied, understanding of this complex phenomenon remains  
54 incomplete. A deeper understanding could help identify additional genes that mediate disease, affording promising  
55 targets for treatment or prevention of disease. We used RNA sequencing data collected at the single cell and bulk  
56 tissue level to identify genes whose expression influenced COVID-19 outcomes. We assessed which variables

*Colocalization of expression transcripts with COVID-19 outcomes is dependent on cell-type and cell-state.*

57 influencing colocalization, including cell type, cell stimulation, RNA sequencing modality, organ, symptoms of  
58 COVID-19, and SARS-CoV-2 status among individuals with symptoms of COVID-19. We observed that  
59 colocalization of specific candidate genes identified by MR was highly variable and influenced by multiple factors,  
60 including cell state and cell population. These results illustrate that even after assessing multiple variables that may  
61 influence colocalization, there existed few examples of genes identified by MR that colocalized with gene  
62 expression. Future studies would benefit from larger transcriptomics study cohorts and more advanced statistical  
63 methods which better account for differences in linkage disequilibrium panels between data sources.

64

65 **Keywords:** COVID-19, colocalization, Mendelian randomization, eQTL, scRNA

*Colocalization of expression transcripts with COVID-19 outcomes is dependent on cell-type and cell-state.*

66 **Introduction:**

67 Severe COVID-19 is partially influenced by immune hyperstimulation (Merad et al. 2022; Tan et al. 2021).  
68 The immune response is mediated by different immune cell subtypes, acting at varying time points during infection  
69 across tissues (Ong et al. 2020; Tan et al. 2021). Understanding the dynamics of this process may pinpoint targets  
70 helpful for COVID-19 interventions, as previously shown (De Biasi et al. 2020; Kundu et al. 2022; Mathew et al.  
71 2020).

72 One way to investigate mechanisms influencing COVID-19 outcomes is to determine the underlying  
73 contributory genetic factors. GWAS has identified 87 loci associated with COVID-19 outcomes, but it is often  
74 unclear which gene(s) at such loci drive this association (Covid-19 Host Genetics Initiative 2021). Resolving a  
75 GWAS locus to its causal gene(s) is non-trivial (Forgetta et al. 2022). One way to identify causal genes at GWAS  
76 loci is to examine whether associated SNPs influence outcomes in an appropriate cell type. However, genetic  
77 determinants of gene expression (expression quantitative trait loci; eQTL) have often failed to “colocalize” with  
78 disease outcomes (Connally et al. 2022). Colocalization, in this context, means that gene expression and the disease  
79 outcome share a single common causal SNP (Connally et al. 2022). This lack of colocalization is concerning and not  
80 fully resolved. However, given the central importance of gene expression in disease incidence and progression,  
81 efforts are required to explain the paradox that the genetic determinants of gene expression often appear different  
82 than the those of disease, even for known causal genes in known causal cell types or tissues (Connally et al. 2022).  
83 We sought to determine if this lack of colocalization could be explained when cell type, cell stimulation, method of  
84 sequencing and organ were taken into account.

85 One factor that may influence colocalization is the population of cells studied. Gene expression is typically  
86 determined in bulk tissue, which provides a mixture of cells from the tissue. Such signal dilution, combined with  
87 complex factors such as cell-cell interactions, may explain why bulk tissue eQTLs often fail to colocalize with  
88 disease outcomes (Connally et al. 2022). Single-cell sequencing studies (scRNA-seq) assay gene expression in  
89 specific cell types and thus single-cell sequencing can provide a less heterogeneous assessment of gene expression.  
90 Comparing colocalization between bulk and single-cell sequencing, studying additional variables that influence the  
91 association, could resolve the contributory factors. This knowledge could help identify causal genes at GWAS loci  
92 and accelerate drug development by targeting pathways causal for disease. Targets supported by MR and  
93 colocalization evidence are more likely to anticipate clinical trial results, where the target of the medicine in the trial

*Colocalization of expression transcripts with COVID-19 outcomes is dependent on cell-type and cell-state.*

94 is a circulating protein and its causal influence upon disease is supported by both MR and colocalization. (Zheng et  
95 al. 2020).

96 Several studies have investigated the relationship between gene expression and COVID-19 outcomes using  
97 older releases of expression data or COVID-19 outcomes. Pairo-Castineira *et al.* found that increased *TYK2* and  
98 decreased *IFNAR2* expression in whole blood were associated with life-threatening COVID-19 (Pairo-Castineira et  
99 al. 2021). Schmiedel *et al.* found several genes whose expression in specific immune cell types and tissues,  
100 including resting and activated naive CD4+ cells, influenced and colocalized with genetic determinants of COVID-  
101 19 outcomes (Schmiedel et al. 2021). D'Antonio et al. found genes that colocalized with COVID-19 loci in whole  
102 blood, including *ABO* and *IFNAR2*, and identified the causal variants using fine-mapping (D'Antonio et al. 2021).

103 Recently, Soskic *et al.* profiled the changes in gene expression in CD4+ T-cells following stimulation with  
104 anti-CD3/anti-CD28 human T-activators (Soskic et al. 2022). We aimed to determine if cell and cell-state specific  
105 gene expression could identify novel determinants of COVID-19 outcomes, suggesting which cells are responsible  
106 for COVID-19 mortality risk and when. Further, we aimed to determine if such cellular specificity may clarify  
107 colocalization of expression and GWAS data. Repeating this analysis in other cell types, bulk whole-blood in  
108 individuals with symptoms of COVID-19, with and without a recent PCR-confirmed infection, and bulk tissues in  
109 individuals assessed prior to the pandemic lacking any symptoms would identify differences in colocalization due to  
110 sequencing modality and different clinical states. The results would afford insights into whether the genetic control  
111 of gene expression and disease risk is clarified when resolving to single cells, specific cellular states and clinical  
112 characteristics of patients sampled.

113 To answer these questions, we undertook a four-stage study design (**Fig. 1**). First, we conducted Mendelian  
114 randomization (MR) of *cis*-eQTLs obtained from single-cell RNA-sequencing (scRNA-seq) data from CD4+ T-cell  
115 subtypes at varying times after stimulation with gene expression as exposures and COVID-19 severity as an  
116 outcome. Second, we tested these MR-identified genes for colocalization with COVID-19 outcomes across all time  
117 points following stimulation of CD4+ T-cells. Third, we compared these colocalization results to those from bulk  
118 whole-blood RNA sequencing obtained from individuals with COVID-19 symptoms, who were either SARS-CoV-2  
119 PCR positive or negative. Fourth, we compared the colocalization results to bulk unstimulated whole blood and 47  
120 other tissues obtained from individuals assessed in GTEx v.8, whose tissues were apparently undiseased at time of  
121 sampling.

*Colocalization of expression transcripts with COVID-19 outcomes is dependent on cell-type and cell-state.*

122           These findings identified 33 genes whose expression may influence COVID-19 outcomes. Colocalization  
123 was highly variable and not consistent across the factors that may influence it. These results underline the  
124 complexity of factors that influence the colocalization of genetic expression with disease.

125

126 **Results:**

127 *Cohort demographics.* All datasets used in this study included individuals solely of European ancestry to reduce  
128 potential confounding by population stratification. ScRNA-seq data for CD4+ T cells in whole blood was obtained  
129 from Soskic *et al.*, who isolated cells from 119 healthy, British-ancestry individuals, with a mean age of 47 years,  
130 where 44% were females (Soskic et al. 2022). Bulk whole-blood RNA sequencing of individuals with symptoms of  
131 COVID-19, who were SARS-CoV-2 positive or negative, was obtained from BQC19, a Quebec cohort of  
132 individuals recruited from hospitals presenting with COVID-19 symptoms. BQC19 RNA-sequencing data  
133 comprised 112 individuals with symptoms of COVID-19 and SARS-CoV-2 positive PCR tests and 166 individuals  
134 who also had symptoms of COVID-19 but a SARS-CoV-2 negative PCR test. The mean age of BQC19 participants  
135 was 54 years and 53% were females. The GTEx Consortium cohort comprised 838 post-mortem donors, including  
136 715 individuals of European ancestry, of which 33.5% were female (GTEx Consortium 2020).

137

138 *MR and sensitivity testing.* To identify genes influencing COVID-19 outcomes, we used either a Wald ratio or  
139 inverse-variance weighted MR analysis at 81 non-MHC COVID-19 associated loci (**Supplemental Table 1**) across  
140 three COVID-19 outcomes (severe disease, hospitalized disease, and susceptibility to disease) with sensitivity  
141 analyses for each test, detailed in **Methods**. We identified 33 genes whose expression was shown by MR to  
142 influence COVID-19 severity and susceptibility (**Fig. 2, Table 1, Supplemental Table 2**).

143 *Single-cell results.* Of the 29,430 combinations of CD4+ cell:stimulation-state:gene:outcome for the whole-blood  
144 single-cell eQTLs, 1,225 transcripts (4.2%) had a multiple-testing, Benjamini-Hochberg adjusted p-value  $\leq 0.05$  in  
145 the MR analyses. We limited results to only those arising from *cis*-eQTLs to reduce potential bias from horizontal  
146 pleiotropy. *Cis*-eQTLs were defined as genetic variants associated with transcript level within  $\pm 500$  kb of the  
147 transcriptional start site. We also only retained *cis*-eQTLs that were within  $\pm 500$  kb of the lead SNP associated with  
148 a COVID-19 outcomes (**Supplemental Table 3**). Only 13 of these 1,225 *cis*-eQTLs passed colocalization sensitivity  
149 testing, defined as having a probability of the gene's expression and the COVID-19 outcome sharing a single causal

*Colocalization of expression transcripts with COVID-19 outcomes is dependent on cell-type and cell-state.*

150 variant (PP<sub>H4</sub>) greater than 0.80 (**Fig. 1-2**). These data demonstrate that only a small proportion of *cis*-single-cell  
151 eQTLs identified via MR colocalized with COVID-19 outcomes, suggesting that such MR findings do not  
152 consistently reflect a common causal genetic signal shared between the transcript and COVID-19 outcomes.

153

154 *Bulk results.* Next, we assessed *cis*-eQTLs from the bulk whole-blood RNA sequencing in the BQC19 cohort, which  
155 comprised individuals with symptoms of COVID-19 who had either a positive, or negative PCR test for SARS-  
156 CoV-2. Of the 5,105 combinations of study-group:gene:outcome for the BQC19 *cis*-eQTLs, 80 transcripts (1.6%)  
157 were identified by MR to have effects on COVID-19 outcomes (**Supplemental Table 4**). Only 4 of these 80  
158 transcripts passed colocalization sensitivity testing (**Fig. 1-2**). We next assessed whether we would observe similar  
159 results if we used whole blood and other organ bulk RNA sequencing from GTEx v.8 (GTEx Consortium 2020) as  
160 the source of the *cis*-eQTLs, that included individuals without symptoms or seropositivity for COVID-19. In GTEx  
161 bulk whole-blood, we found that of the 2,660 combinations of gene:outcome for the GTEx *cis*-eQTLs, 75 (2.8%)  
162 were identified by MR testing to have effects upon COVID-19 outcomes, with only two colocalizing (**Fig. 1-2**). In  
163 all 48 GTEx tissues, we found that of the 125,088 combinations of tissue:gene:outcome tested, 3190 (2.6%) were  
164 estimated to influence COVID-19 outcomes by MR but only 98 of these colocalized (**Fig. 2**).

165

166 Thus, taken together, across the three different sources of gene expression data (scRNA-seq whole blood CD4+ T-  
167 cells, bulk whole blood RNA sequencing in patients with symptoms of COVID-19, and bulk RNA sequencing in  
168 individuals whose tissues were apparently health across 48 tissues, including whole blood), we observed 33 unique  
169 putatively causal transcripts across 115 specific states that colocalized, which represent 2.3% of those transcripts  
170 that survived MR testing and multiple testing thresholds. These findings suggest that most transcripts identified to be  
171 associated with COVID-19 outcomes via MR fail to colocalize even across single cell and bulk sequencing, as well  
172 as different cellular states and patient states.

173

174 *MR implicated several cis-eQTLs that increase or decrease the risk for COVID-19 outcomes with few overlapping*  
175 *transcripts between scRNA-seq and bulk RNA sequencing results.* Across outcomes, all cell types from the scRNA-  
176 seq whole-blood data had at least one *cis*-eQTL estimated to be causal for a COVID-19 outcome via MR, except T  
177 effector memory re-expressing CD45RA and T regulatory cells (**Fig. 2**). Of the four genes estimated to have

*Colocalization of expression transcripts with COVID-19 outcomes is dependent on cell-type and cell-state.*

178 colocalized causal effects from the whole-blood scRNA-seq MR experiments, *RALGDS* expression was the only *cis*-  
179 eQTL that decreased the risk of COVID-19 outcomes. Specifically, *RALGDS* expression reduced the risk of severe  
180 disease (OR = 0.78, 95% CI: 0.71-0.87; adjusted  $p = 1.1 \times 10^{-4}$ ) and susceptibility to disease (OR = 0.88, 95% CI:  
181 0.86-0.90; adjusted  $p = 7.4 \times 10^{-18}$ ), when expressed in solely T effector memory cells 16 hours after stimulation  
182 (**Fig. 2**). *RALGDS*' influence on hospitalized COVID-19 was not clearly different from the null (OR = 0.87, 95% CI:  
183 0.79-0.96; adjusted  $p = 0.08$ ) but passed MR sensitivity testing and colocalized. *NAPSA* expression in T naive cells  
184 40 hours after stimulation increased risk of hospitalized (OR = 1.17, 95% CI: 1.08-1.28; adjusted  $p = 5.0 \times 10^{-3}$ ) and  
185 susceptibility to (OR = 1.08, 95% CI: 1.05-1.11; adjusted  $p = 1.7 \times 10^{-5}$ ) COVID-19 (**Fig. 2**). *NAPSA*'s influence on  
186 severe COVID-19 was not different from the null (OR = 1.20, 95% CI: 1.06-1.37; adjusted  $p = 0.07$ ) but passed MR  
187 sensitivity testing and colocalized. *NAPSA* also increased risk for every outcome in T effector memory cells 40  
188 hours after stimulation (OR = 1.18, 95% CI: 1.10-1.27; adjusted  $p = 4.0 \times 10^{-4}$  for severe, OR = 1.15, 95% CI: 1.10-  
189 1.20; adjusted  $p = 5.9 \times 10^{-9}$  for hospitalized, OR = 1.04, 95% CI: 1.03-1.06; adjusted  $p = 1.2 \times 10^{-4}$  for  
190 susceptibility) (**Fig. 2**).

191 Interestingly, none of the colocalizing transcripts from scRNA-seq overlapped with colocalizing bulk RNA  
192 sequencing *cis*-eQTLs from BQC19 or GTEx in matching tissues. Generally, signals in bulk sequencing were harder  
193 to separate from noise, compared to single-cell results. Increased *IFNAR2* expression was protective in individuals  
194 with symptoms of COVID-19 without PCR-confirmed SARS-CoV-2 against severe COVID-19, or individuals who  
195 were negative for or had perhaps not yet tested positive for COVID-19 (OR = 0.75, 95% CI: 0.66-0.86; adjusted  $p =$   
196  $3.0 \times 10^{-3}$ ) with insufficient evidence to suggest protection for individuals who did test positive (adjusted  $p = 0.04$ )  
197 where it failed weighted mode MR sensitivity testing but colocalized. In contrast, *IFNAR2* was protective for only  
198 individuals who tested positive for SARS-CoV-2 against hospitalized COVID-19 (OR = 0.86, 95% CI: 0.80-0.94;  
199 adjusted  $p = 0.03$ ) with insufficient evidence to suggest protection for BQC19 SARS-CoV-2 negative individuals  
200 (adjusted  $p = 8.1 \times 10^{-3}$ ) where it failed MR Egger intercept sensitivity testing ( $p = 0.02$ ) while colocalizing (**Fig. 2**).  
201 This was perhaps a false negative. There were several other genes that colocalized for only a subset of outcomes in  
202 other tissues, although some consistently colocalized in the same tissue across outcomes, such as ABO in the testis  
203 and DPP9 in sun-exposed skin (**Table 1, Supplemental Table 2**).

204



*Colocalization of expression transcripts with COVID-19 outcomes is dependent on cell-type and cell-state.*

205 *Colocalization of specific MR-identified cis-eQTLs depended on cell stimulation.* To investigate the variables that  
206 influenced colocalization, we conducted colocalization on each gene that was estimated causal in MR. Most MR-  
207 identified transcripts did not colocalize (**Fig. 1, Supplemental Tables 6-8**). The proportion of estimated causal  
208 transcripts that colocalized and passed single causal variant sensitivity testing was 1.1% for whole blood single-cell  
209 eQTLs, 5.0% for BQC19, 2.7% for GTEx whole blood, and 3.1% for all organs in GTEx (**Fig. 3**). Colocalization of  
210 2/4 single-cell eQTLs was specific to cell type (**Fig. 2**) with 3/3 from stimulated cells specific to cell state with  
211 colocalization for *RALGDS*, for example, specific to T effector memory cells 16 hours post-stimulation for severe  
212 and susceptibility to COVID-19 (**Fig. 4**).

213 Colocalization of transcripts occurred at varying times following stimulation (**Fig. 2**). Colocalization did  
214 not appear to depend on SARS-CoV-2 PCR result in BQC19 among individuals with symptoms of COVID-19, as  
215 seen with *IFNAR2* (**Fig. 2, Fig. 5**). Colocalization of select transcripts appeared organ specific, as with *MUC5B*  
216 (**Fig. 6**), although there was more noise in bulk sequencing data, as was observed for *ABO*. Specifically, *ABO*  
217 colocalized in some organs for only a single outcome and *IL10RB* tested in GTEx had an opposite direction of effect  
218 in cultured fibroblasts than tibial nerve (**Fig. 2**).

219 While many transcripts did not colocalize, many transcripts that did have evidence of the single causal  
220 variant assumption being violated, with multiple peaks present within or close to the cognate 1 Mb window,  
221 suggesting bias due to linkage disequilibrium (**Fig. 7**). Of 19 colocalizing transcripts in single-cell CD4+ T cells, 6  
222 had evidence of violating this assumption. Of 9 colocalizing transcripts in bulk whole blood from patients with  
223 symptoms of COVID-19 in BQC19, we observed 6 that violated this assumption. Of 4 from bulk whole blood in  
224 GTEx, 2 violators. Of 378 from all tissues in GTEx, 265 transcripts violated this assumption. These results underpin  
225 the limitations of present study sample sizes and existing methods designed to clarify causal colocalizing expression  
226 signals.

227

## 228 **Discussion:**

229 In this study, we attempted to identify factors that influence colocalization of *cis*-eQTL MR findings for  
230 COVID-19 outcomes. Most MR-identified single-cell eQTLs and bulk eQTLs did not colocalize, suggesting that  
231 linkage disequilibrium and limited study sizes yielding fewer converging signals may strongly impact the validity of  
232 eQTL MR studies that assess colocalization, and necessitate more stringent quality control. Previous research has

*Colocalization of expression transcripts with COVID-19 outcomes is dependent on cell-type and cell-state.*

233 demonstrated a lack of colocalization of expression findings and suggested that this may be resolved by single-cell  
234 eQTL analyses, assessing stimulation state, or clearly defining the state of the individual when blood samples were  
235 drawn. Here we show that colocalization of these signals is highly variable, and it is not fully explained by changing  
236 cell type, cell stimulation, symptoms of COVID-19, or organ. Taken together, these findings suggest that  
237 colocalization of eQTLs with disease outcomes is difficult using current technologies, reference panels and  
238 statistical methods, and with present study sample sizes that in single-cell studies typically is limited to 100  
239 individuals.

240 While we overall found colocalization to be limited, our results were reassuring in that we observed some  
241 trends and results consistent with past studies and hypotheses (**Fig. 2**) (Connally et al. 2022; Soskic et al. 2022). For  
242 putatively causal transcripts from CD4+ T cells in whole blood, colocalization was influenced by cell stimulation, or  
243 cell state (**Fig. 2a**), like other groups' observations when conducting colocalization without MR (Soskic et al. 2022).  
244 On comparing putatively causal transcripts between single-cell and bulk results, with the latter evaluating transcripts  
245 in several different cells in a matching tissue, we found no overlap between the modalities in the same tissue, that  
246 could suggest that sequencing modality plays a role (**Fig. 2**). Genes that colocalized in CD4+ T cells did not  
247 colocalize in spleen that is enriched with T cells (**Fig. 2**). This could underscore the impact of sequencing multiple  
248 cell types in bulk sequencing, suggesting that results must be contextualized against sequencing modality and  
249 sample cellular heterogeneity. We found organ to play a moderate role in colocalization when comparing putatively  
250 causal genes in GTEx (**Fig. 2b**), supporting others' findings with non-COVID-19 outcomes (Rocheleau et al. 2022).  
251 The data on organs' roles were perhaps noisy. While we found outcome to have a limited role in influencing  
252 colocalization for select transcripts, different from others (Rocheleau et al. 2022; Soskic et al. 2022), this could be  
253 due to the greater similarity in our outcomes.

254 This paper has limitations. The scRNA-seq data came from cells stimulated by a standard T cell stimulator  
255 rather than SARS-CoV-2. Such stimulation has been employed by several existing works studying immunity in  
256 COVID-19 (De Biasi et al. 2020; Kundu et al. 2022; Mathew et al. 2020) and may have some relevance to the  
257 stimulation endured when T-cells encounter SARS-CoV-2. We only investigated CD4+ T cells in whole blood (**Fig.**  
258 **2**). There are other cell types present in greater proportions, which could explain the minimal overlap in  
259 colocalization between our single-cell and bulk sequencing results. We could only locate whole blood *cis*-sceQTLs  
260 from an admixed study that did not release ancestry-stratified results (Randolph et al. 2021). Ancestry-stratified

*Colocalization of expression transcripts with COVID-19 outcomes is dependent on cell-type and cell-state.*

261 results are important for Mendelian randomization and colocalization to limit bias from indirect pleiotropic  
262 mechanisms, including linkage disequilibrium that varies by ancestral group. Our GTEx results show that many  
263 tissues could contribute to COVID-19 outcomes and pathogenesis (**Fig. 2**). Single-cell analysis of all tissues,  
264 particularly lung, could help understand the multi-system basis of post-COVID-19 syndrome (Mehandru and Merad  
265 2022). We were unable to access single-cell lung data for this work (Lamontagne et al. 2018). Our outcomes were  
266 limited to COVID-19 severity and susceptibility, when expression could also influence complications of COVID-19,  
267 such as post-COVID-19 syndrome and schizophrenia (Baranova et al. 2022b; Mehandru and Merad 2022). We have  
268 developed two-step MR methods that link gene expression to COVID-19 outcomes, and then to these complications  
269 (Yoshiji et al. 2023), which has already been used to validate BMI's role on COVID-19 outcomes as discovered by  
270 others (Baranova et al. 2023).

271 Our study was limited to individuals of European ancestry. While the HGI has found loci with genome-  
272 significant variants in other ancestries, none of the loci from Admixed American, African, East Asian, or South  
273 Asian ancestry for any outcome overlapped with loci found to influence COVID-19 outcomes in this study. Given  
274 fewer loci in non-European datasets, this could be due to sample size and underscores the importance of multi-  
275 ancestry analyses. However, even within European ancestry individuals, subtle differences in LD patterns can  
276 influence colocalization, which we observed (**Fig. 4-6**) (Kanai et al. 2022; Kanai et al. 2021). Such differences may  
277 have impacted the lack of colocalization observed here. Sample size was limited for the eQTL datasets that we  
278 employed, which increases the risk of biased results, which we possibly observed where some genes colocalized for  
279 only a single outcome or did not colocalize in one outcome (**Fig. 2**). We adjusted for this by using methods well  
280 established in the literature, including several stringent and conservative sensitivity tests and means of quality  
281 control for MR and colocalization. While using a colocalization window around a lead variant of  $\pm 500$  kb is more  
282 likely to limit bias from pleiotropy, it increases the risk of missed signals. Data must still be carefully appraised for  
283 possible false positives, as may be the case with *IL10RB* being estimated protective in cultured fibroblasts for all  
284 outcomes but increasing the risk of COVID-19 outcomes in the tibial nerve for all outcomes (**Fig. 2**).

285 While we found symptoms of COVID-19 to influence genomic colocalization for select transcripts and  
286 states, as shown by *IFNAR2* between severe and hospitalized COVID-19, this trend could have been influenced by a  
287 batch effect. SARS-CoV-2 status' effect on colocalization among individuals in BQC19 could be biased as negative  
288 results could represent false negatives and individuals with COVID-19 symptoms could have had a different viral

*Colocalization of expression transcripts with COVID-19 outcomes is dependent on cell-type and cell-state.*

289 illness. We mitigated this by deriving eQTLs using the same pipeline used by GTEx and limiting the conclusions we  
290 made given this context (GTEx Consortium 2020). Generally, we investigated variables in multiple datasets, given  
291 that a variable's demonstrated role in multiple cohorts supports making a generalization.

292

293 **Conclusions:** While existing hypotheses suggest that colocalization of transcripts depends on multiple conditions,  
294 we found that *cis*-eQTLs identified by MR for COVID-19 outcomes rarely colocalized, even when assessing  
295 different cell types, cell states, symptoms of COVID-19 and organs. Taken together, these findings suggest that  
296 even after accounting for variables, there was little evidence of colocalization for most genes whose influence on  
297 COVID-19 outcomes was identified through MR.

298

## 299 **Figure Captions**

300 **Fig. 1.** Study overview

301 **Fig. 2.** A total of 33 genes that colocalized across body tissue, evaluated at the (a) single-cell and (b) bulk tissue  
302 level, were estimated to have their expression increase (red) and decrease (blue) risk of COVID-19 outcomes. In  
303 bulk tissue, COVID+ referred to individuals who had tested positive for COVID-19 with COVID- for those who  
304 tested negative and Symptoms+ refers to individuals who presented with symptoms of COVID-19 with Symptoms-  
305 referring to those who did not have symptoms of COVID-19. Note that some transcripts show increased expression  
306 in some tissues to be associated with COVID-19 outcomes, whereas other tissues show decreased expression to be  
307 associated with the same transcript for the same outcome. TCM: T central memory cell. TEM: T effector memory  
308 cell. TN: T naïve cell.

309 **Fig 3.** The proportion of estimated causal variants that colocalized and passed sensitivity testing. Orange bars refer  
310 to single cell data, gray bulk sequencing.

311 **Fig 4.** Locuszoom plots for *RALGDS* in the setting of variable cell stimulation and cell type, with selected variant of  
312 rs8176719. *RALGDS* was estimated causal with colocalization for only T effector memory (TEM) cells 16 hours  
313 post-stimulation, highlighting the role of cell stimulation on colocalization. A \* indicates a dataset that colocalized.  
314 rs8176719 was not detected in T naïve cells 16 hours post-stimulation, so rs7036642 was highlighted, which is in  
315 LD with rs8176719.

*Colocalization of expression transcripts with COVID-19 outcomes is dependent on cell-type and cell-state.*

316 **Fig 5.** Locuszoom plots for *IFNAR2* in the setting of variable presence of COVID-19 symptoms and SARS-CoV-2  
317 positivity, with selected variant of rs9636867. *IFNAR2* was estimated causal and colocalized only in patients with  
318 COVID-19 symptoms (Symptoms +/-) with SARS-CoV-2 status (COVID +/-) having a less apparent role. A \*  
319 indicates a dataset that colocalized.

320 **Fig 6.** Locuszoom plots for *MUC5B* in the setting of variable organ in GTEx v8, with selected variant of  
321 rs35705950. *MUC5B* was estimated causal and colocalized only in lung for severe COVID-19. There were no *cis*-  
322 eQTLs for whole blood.

323 **Fig 7.** Percentage of colocalizing results ( $PP_{H4} \geq 0.80$ ) that had evidence of violating the single causal variant  
324 assumption. Orange bars refer to single cell data, gray bulk sequencing.

325

326

327

### 328 **Table Captions**

329 **Table 1.** Putatively causal associations of gene expression with COVID-19 outcomes. While some genes had  
330 opposite effects on risk for a minority of tissues (bolded), the direction of effect of most was consistent when  
331 observed in multiple tissues.

332

### 333 **Supplemental Table Captions**

334 **Supplemental Table 1.** All lead variants in HGI European-ancestry data, excluding MHC loci.

335 **Supplemental Table 2.** All genes that were estimated causal and colocalized in our study, with existing evidence  
336 linking genes to outcomes.

337 **Supplemental Table 3.** All MR results using CD4+ T cell expression data.

338 **Supplemental Table 4.** All MR results using expression data from individuals with symptoms of COVID-19 in  
339 BQC19.

340 **Supplemental Table 5.** All MR results using expression data from all tissues in GTEx.

341 **Supplemental Table 6.** All colocalization results of putatively causal variants from CD4+ T cell expression data.

342 **Supplemental Table 7.** All colocalization results of putatively causal variants from individuals with symptoms of  
343 COVID-19 in BQC19.

*Colocalization of expression transcripts with COVID-19 outcomes is dependent on cell-type and cell-state.*

344 **Supplemental Table 8.** All colocalization results of putatively causal variants from all tissues in GTEx.

345

346 **Methods:**

347 **Datasets.** We examined *cis*-eQTLs in three datasets to implicate their influence on COVID-19 outcomes and  
348 investigate how experimental and physiological conditions impact colocalization (**Fig. 1**). scRNA-seq *cis*-eQTLs  
349 from Soskic *et al.* were used to analyze how cell type, cell stimulation, and cell microenvironment affected  
350 colocalization (Soskic et al. 2022). Bulk RNA-seq *cis*-eQTLs from Biobanque Quebecoise de la COVID-19  
351 (BQC19) were used to investigate how disease state impacted identified *cis*-eQTLs and colocalization in individuals  
352 with symptoms of COVID-19, with and without PCR-confirmed SARS-CoV-2 infection. Bulk RNA-seq *cis*-eQTLs  
353 from GTEx whole blood were used to compare BQC19 data with data from individuals without symptoms of  
354 COVID-19 with all other organs used to determine the role of organ (GTEx Consortium 2020).

355

356 *Whole-blood single-cell eQTLs.* The summary statistics for immune cell expression *cis*-eQTLs before and after  
357 stimulation with anti-CD3/anti-CD28 human T-Activators were obtained from Soskic *et al.* (Soskic et al. 2022). The  
358 study consisted of 119 individuals of British ancestry with peripheral blood mononuclear cells (655,349 CD4+ T  
359 cells) sequenced using scRNA-seq (Soskic et al. 2022). We used the summary statistics for cells at all available time  
360 points (unstimulated, 16 hours post-stimulation corresponding to before cell division, 40 hours post-stimulation  
361 corresponding to after cell division, five days post-stimulation corresponding to gaining effector function) for cell  
362 types present before stimulation and present for at least one time point after stimulation (Soskic et al. 2022). The  
363 unstimulated time point acted as a control for stimulation, sequenced 16 hours after culturing without any anti-  
364 CD3/anti-CD28 human T-Activators (Soskic et al. 2022). We investigated CD4+ antigen-I and CD4+ memory cell  
365 classifications before Leiden-algorithm clustering, implemented by Soskic et al., and T I, T central memory, T  
366 effector memory, CD45RA re-expressing T effector memory, and thymus-derived regulatory T cells after clustering  
367 (Soskic et al. 2022). Full details describing RNA sequencing, separation of cell types and stimulation are available  
368 in Soskic *et al.* (Soskic et al. 2022).

369 *Bulk whole blood eQTLs from subjects with symptoms of COVID-19, with and without SARS-CoV-2 positive PCR*

370 *results.* BQC19 (<https://en.quebecovidbiobank.ca>) is a prospective cohort enrolling participants with PCR-proven

371 SARS-CoV-2 infection and PCR-proven SARS-CoV-2 negative individuals who presented to the hospital with signs

*Colocalization of expression transcripts with COVID-19 outcomes is dependent on cell-type and cell-state.*

372 or symptoms consistent with COVID-19. Participants were recruited from eight academic hospitals in the province  
373 of Quebec, Canada. A total of 4,704 participants underwent PCR testing with confirmed positive or negative results  
374 between January 25<sup>th</sup>, 2020 to March 20<sup>th</sup>, 2022. A total of 379 participants had RNA extracted and sequenced with  
375 eQTLs called using the GTEx pipeline, available from the Broad Institute ([https://github.com/broadinstitute/gtex-](https://github.com/broadinstitute/gtex-pipeline/tree/master/qlt)  
376 [pipeline/tree/master/qlt](https://github.com/broadinstitute/gtex-pipeline/tree/master/qlt)). We used data solely for those of non-Finnish European ancestry, which included 112  
377 SARS-CoV-2 positive and 166 SARS-CoV-2 negative samples.

378  
379 *GTEx release 8 data.* We obtained *cis*-eQTL summary statistics for GTEx release 8 for whole-blood and all other  
380 organs, restricted to individuals of European ancestry, from: <https://www.gtexportal.org/home/> (GTEx Consortium  
381 2020).

382  
383 *COVID-19 Outcome Data.* European-ancestry-specific summary statistics for COVID-19 outcomes were obtained  
384 from the COVID-19 Host Genetics Initiative (HGI) release 7 (<https://www.covid19hg.org/>), which did not include  
385 individuals from 23AndMe (Covid-19 Host Genetics Initiative 2021). The COVID-19 outcomes included severe  
386 COVID-19 (13,769 cases and 1,072,442 controls), COVID-19 hospitalization (32,519 cases and 2,062,805 controls),  
387 and susceptibility to COVID-19 (122,616 cases and 2,475,240 controls). Severe COVID-19 was defined as COVID-  
388 19 requiring respiratory support or resulting in death. COVID-19 with hospitalization was defined as an infection  
389 requiring hospitalization or death. COVID-19 susceptibility was defined as infection determined by self-report on a  
390 questionnaire, electronic medical record diagnosis, or laboratory testing (serology tests or nucleic acid  
391 amplification). Controls were all individuals who did not meet an outcome's definition.

392  
393 **MR of *cis*-eQTLs with COVID-19 outcomes.** We used MR to estimate the causal relationship between exposures  
394 (which here are RNA transcript levels) and COVID-19 outcomes to determine how cell type, cell stimulation, time  
395 after stimulation, symptoms of COVID-19, PCR result for SARS-CoV-2 among individuals with symptoms of  
396 COVID-19, and organ influenced the relationship between gene expression and COVID-19 outcomes. MR studies  
397 use SNPs strongly associated with an exposure as instrumental variables to estimate the effect of an exposure on an  
398 outcome. Such studies reduce potential confounding effects because genetic variants are essentially randomized at  
399 conception. They also prevent bias due to reverse causation (wherein the outcome influences the exposure) since the



*Colocalization of expression transcripts with COVID-19 outcomes is dependent on cell-type and cell-state.*

400 assignment of genetic variants always precedes disease onset (Smith and Ebrahim 2003). The main assumptions of  
401 MR are that the variants under study are strongly associated with the risk factor of interest, confounders of the  
402 exposure-outcome relationship are not associated with the variants, and the variants only affect the outcome through  
403 the risk factor (Davies et al. 2018; Skrivanekova et al. 2021). The most problematic of these assumptions is the last,  
404 as it is difficult to confidently understand if the SNPs affect the outcome independent of the exposure (i.e. a lack of  
405 horizontal pleiotropy). To partially mitigate against such potential bias, we have used only *cis*-eQTLs, which are  
406 more likely to act directly through the transcription or translation of the proximal gene, rather than through  
407 horizontally pleiotropic pathways. There was overlap of individuals from the *cis*-eQTL studies with individuals in  
408 the HGI data.

409 To undertake MR analyses, we used the TwoSampleMR (v0.5.6) package  
410 (<https://mrcieu.github.io/TwoSampleMR/>). First, we identified all genome significant ( $p \leq 5 \times 10^{-8}$ ) loci from HGI  
411 COVID-19 summary statistics. We isolated all variants 500 kb upstream and downstream of the lead HGI variant for  
412 each locus for each exposure and outcome. Second, we excluded the MHC locus (chr6: 28,510,120 – 33,480,577;  
413 GRCh38) to reduce potential confounding by linkage disequilibrium structure. Third, the exposure *cis*-eQTLs,  $\pm 500$   
414 kb from their transcriptional start sites, for each cell type, cell stimulation state, cell stimulation time, SARS-CoV-2  
415 status, presence of COVID-19 symptoms, and gene were filtered for variants in LD using the package's clumping  
416 function with default settings. Fourth, the exposure data were harmonized with outcome data using default settings.  
417 Fifth, we conducted MR with sensitivity tests. For loci with only one remaining *cis*-eQTL following harmonization,  
418 we applied Wald Ratio-based MR. For loci with more than one remaining independent *cis* variant, we used inverse-  
419 variance weighted MR (MR-IVW). For loci with three or more remaining *cis*-eQTLs, we did sensitivity testing  
420 using exposure MR weighted median, MR weighted penalized median, MR weighted mode, MR Egger regression,  
421 and MR Egger intercept. MR Steiger was done for every test to assess for reverse causation, wherein the MR results  
422 would be better explained by the effects of COVID-19 on the *cis*-eQTL. Results were retained for downstream  
423 analysis if they passed these sensitivity tests with a Wald Ratio or IVW Benjamini-Hochberg adjusted p-value,  
424 which controls the false-discovery rate by adjusting the p-value by the number of tests, less than or equal to 0.05.

425

426 **Colocalization.** To investigate whether *cis*-eQTLs shared the same single causal signal with COVID-19 outcomes,  
427 we used coloc v5.1.1 (<https://chr1swallace.github.io/coloc/>). Colocalization helps to guard against bias due to



*Colocalization of expression transcripts with COVID-19 outcomes is dependent on cell-type and cell-state.*

428 confounding from linkage disequilibrium. Such confounding can occur when the SNPs that influence an exposure  
429 (here *cis*-eQTLs) do not causally influence an outcome (here COVID-19 outcomes) but are associated with each  
430 other due to linkage disequilibrium. Consistent with Soskic *et al.*, we required at least 50 variants for each  
431 colocalization analysis (Soskic et al. 2022). We employed default priors of  $p_1=p_2=10^{-4}$  and  $p_{12}=10^{-5}$  where  $p_1$  is the  
432 prior probability that only eQTLs had a genetic association in the region,  $p_2$  is a prior probability that only the HGI  
433 summary statistics had a genetic association in the region, and  $p_{12}$  is the prior probability that the eQTL data and the  
434 HGI summary statistics shared the same genetic associations in the region. A  $p_{12} \geq 0.8$ , or  $PP_{H4} \geq 0.8$  was  
435 considered evidence of colocalization. Sensitivity tests were conducted using coloc's sensitivity test function for  
436 each instance of colocalization to validate the single causal variant assumption and evaluate the robustness of results  
437 to different prior settings. Locuszoom plots used to highlight trends were produced using Locuszoom (Pruim et al.  
438 2010).

439

440 **Ethics statement.** Soskic *et al.* biological samples were ethically sourced and used in research under an institutional  
441 review board-approved protocol (Soskic et al. 2022). BQC19 received ethical approval from the Jewish General  
442 Hospital research ethics board (2020-2137) and the Centre Hospitalier de l'Université de Montréal institutional  
443 ethics board (MP-02-2020-8929, 19.389). Specimens collected by GTEx were sourced per protocol for an  
444 institutional review board (GTEx Consortium 2020).

445

446 **Data availability.** Data from Soskic *et al.* are available through Zenodo (doi:10.5281/zenodo.6006796). BQC-19  
447 data, including expression data, is available by application: <https://www.bqc19.ca/>. GTEx release 8 data is available  
448 from: <https://www.gtexportal.org/home/>. COVID-19 HGI summary statistics are available from:  
449 <https://www.covid19hg.org/>.

450

451 **Code availability.** All analyses were conducted in R v4.0.5 (R Core Team 2021). Code is available at:  
452 [https://github.com/richardslab/dynamic\\_QTL\\_COVID19](https://github.com/richardslab/dynamic_QTL_COVID19).

453

454 **Acknowledgements.** JDSW is a graduate student in McGill's Quantitative Life Sciences Ph.D. program. This work  
455 was made possible through open sharing of data and samples from BQC19. We thank all participants of BQC19 for

*Colocalization of expression transcripts with COVID-19 outcomes is dependent on cell-type and cell-state.*

456 their contribution. We thank Vincent Mooser, director of BQC19, for his contributions organizing BQC19. Some  
457 transcriptomics sequencing was performed at the McGill University Genome Centre (Montreal, Quebec, Canada) by  
458 Ariane Boisclair, Janick St-Cyr, Pouria Jandaghi, Daniel Auld. The remainder of the transcriptomics sequencing was  
459 performed at the Centre d'expertise et de services Génome Québec (Montreal, Quebec, Canada), facilitated by the  
460 diligent work of Alexandre Montpetit, Isabelle Guillet, Joelle Fontaine, Martine Lavoie, and Genevieve DonPierre.  
461 Kevin Liang contributed to paper revisions.

462  
463 **Funding sources.** This work is supported by the CIHR (JDSW CIHR 476575). BQC19 was funded by the Fonds de  
464 recherche du Québec – Santé, Génome Québec and the Public Health Agency of Canada. The Richards research  
465 group is supported by the Canadian Institutes of Health Research (CIHR: 365825; 409511, 100558, 169303), the  
466 McGill Interdisciplinary Initiative in Infection and Immunity (MI4), the Lady Davis Institute of the Jewish General  
467 Hospital, the Jewish General Hospital Foundation, the Canadian Foundation for Innovation, the NIH Foundation,  
468 Cancer Research UK, Genome Québec, the Public Health Agency of Canada, McGill University, Cancer Research  
469 UK [grant number C18281/A29019] and the Fonds de Recherche Québec Santé (FRQS). JBR is supported by a  
470 FRQS Mérite Clinical Research Scholarship. Support from Calcul Québec and Compute Canada is acknowledged.  
471 These funding agencies had no role in the design, implementation or interpretation of this study.

472 **Disclosures:** JBR's institution has received investigator-initiated grant funding from Eli Lilly, GlaxoSmithKline and  
473 Biogen for projects unrelated to this research. He is the CEO of 5 Prime Sciences ([www.5primesciences.com](http://www.5primesciences.com)),  
474 which provides research services for biotech, pharma and venture capital companies for projects unrelated to this  
475 research.

476  
477

Colocalization of expression transcripts with COVID-19 outcomes is dependent on cell-type and cell-state.

478 **Figures.**

479

Study Aim: To determine the role of cell type, cell stimulation, COVID-19 symptoms and PCR result among symptomatic patients, and organ on colocalization.

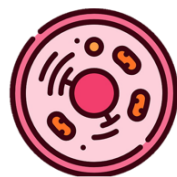

(Un)stimulated CD4+ cells  
Whole-blood  $\pm$  COVID-19  
All GTEx Tissues

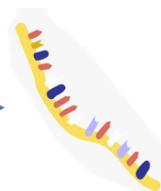

*Cis*-eQTL  
Transcripts

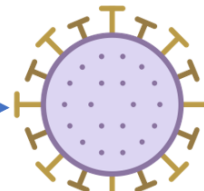

Severe COVID-19  
COVID-19 Hospitalization  
COVID-19 Susceptibility

480

Mendelian randomization and colocalization of *cis*-eQTLs with COVID-19 Outcomes

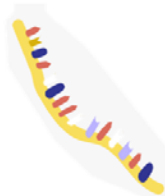

Two-sample MR with sensitivity testing

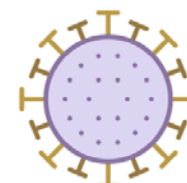

Cell and Cell State (Blood): scRNA-seq: 29,430 tests  
Disease State (Blood): bulk RNA-seq: 5,105 tests  
Non-Diseased State (Blood): bulk RNA-seq: 2,660 tests

Severe COVID-19  
COVID-19 Hospitalization  
COVID-19 Susceptibility

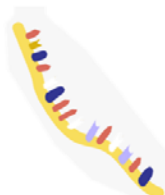

Colocalize putative causal genetic expression

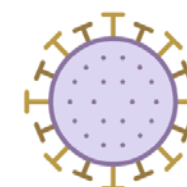

Cells and Cell State (Blood): 1,225 transcripts  
Disease State (Blood): 80 transcripts  
Non-Diseased State (Blood): 75 transcripts

Severe COVID-19  
COVID-19 Hospitalization  
COVID-19 Susceptibility

481

482

483

**Fig. 1.**

*Colocalization of expression transcripts with COVID-19 outcomes is dependent on cell-type and cell-state.*

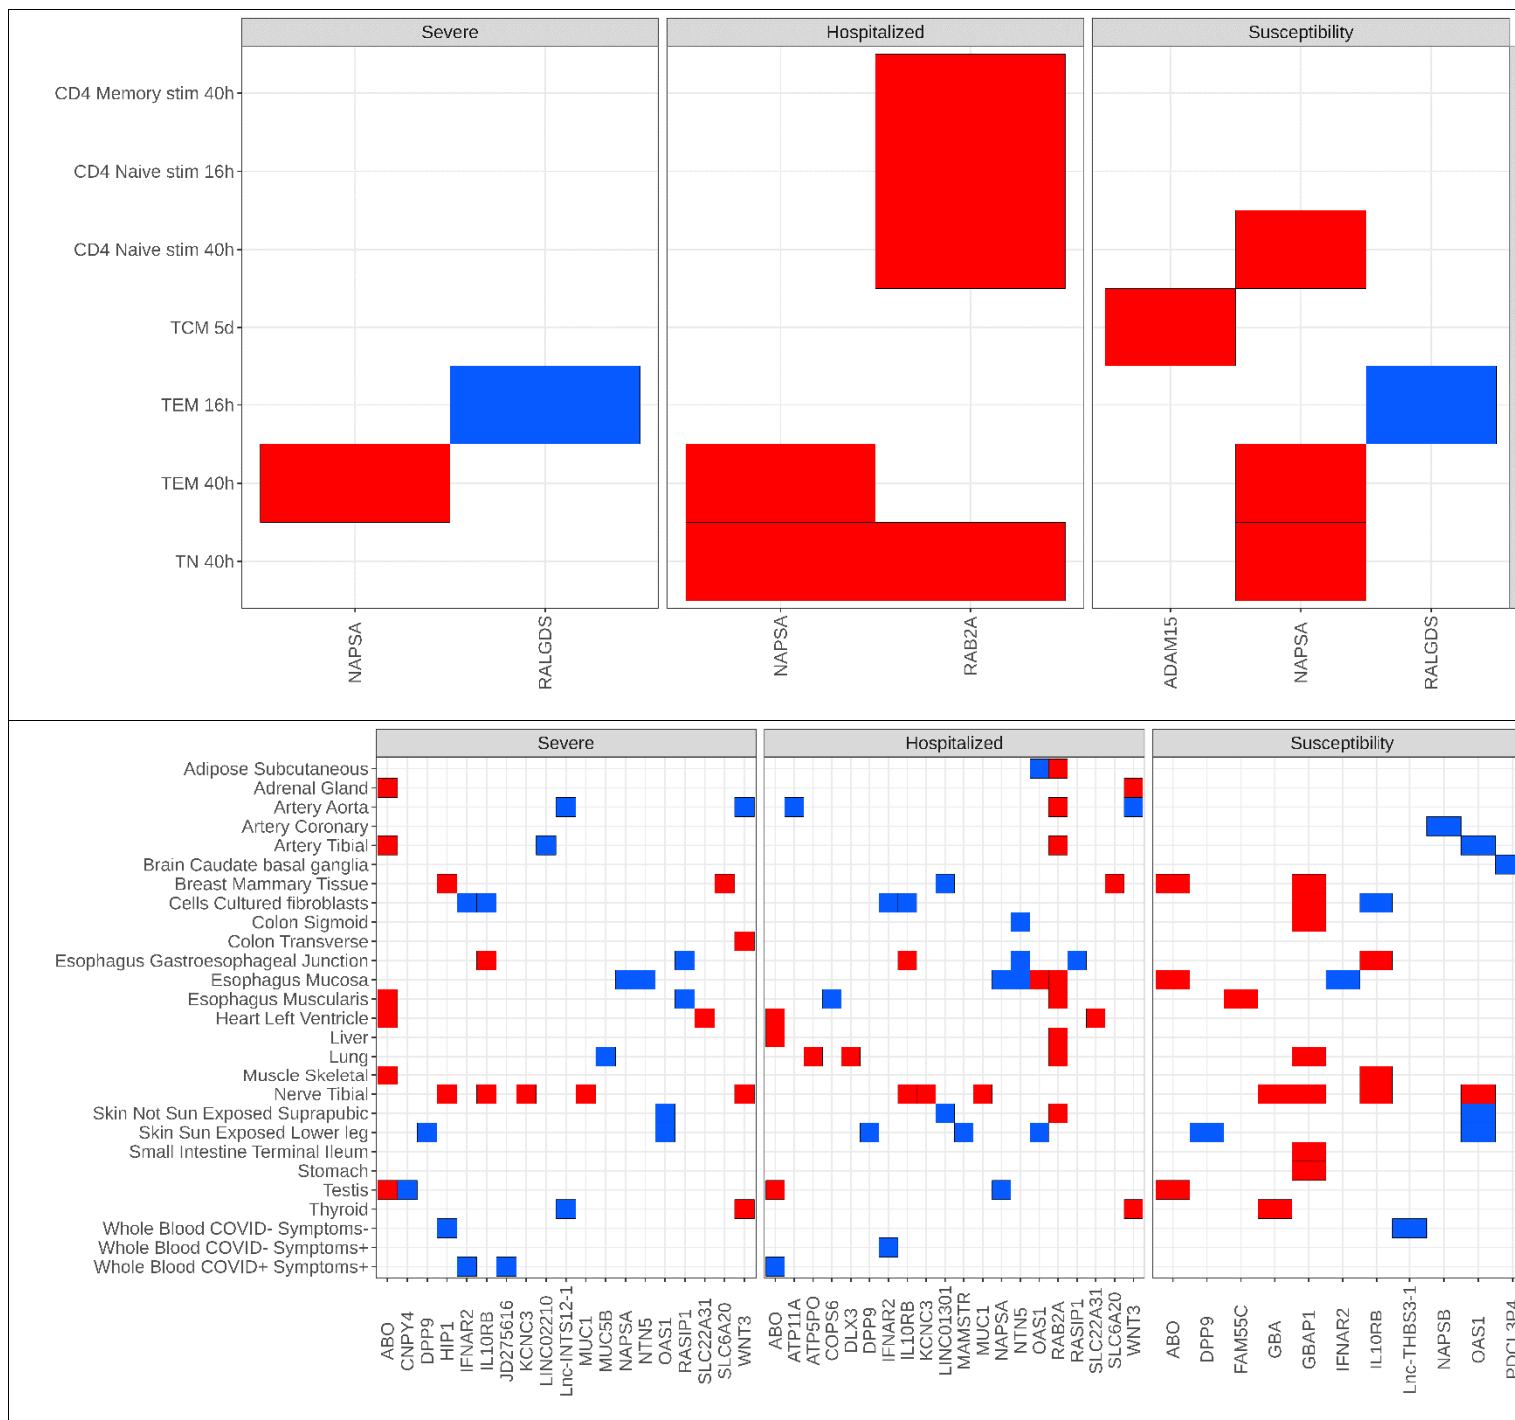

484 **Fig. 2.**

485

486

*Colocalization of expression transcripts with COVID-19 outcomes is dependent on cell-type and cell-state.*

487 **Table 1.**

| Gene          | Putatively causal cell/tissue                                                                                                                                                                                                                                                                                                                                                                                                                                                                                                                                         | Existing evidence                                                                                                                                                                                          |
|---------------|-----------------------------------------------------------------------------------------------------------------------------------------------------------------------------------------------------------------------------------------------------------------------------------------------------------------------------------------------------------------------------------------------------------------------------------------------------------------------------------------------------------------------------------------------------------------------|------------------------------------------------------------------------------------------------------------------------------------------------------------------------------------------------------------|
| <i>ABO</i>    | Adrenal gland (Severe) – Hazardous<br>Artery tibial (Severe) – Hazardous<br>Breast Mammary Tissue (Susceptible) – Hazardous<br>Esophagus mucosa (Susceptible) – Hazardous<br>Esophagus muscularis (Severe) – Hazardous<br>Heart Left Ventricle (Severe and Hospitalized) – Hazardous<br>Liver (Hospitalized) – Hazardous<br>Muscle skeletal (Severe) – Hazardous<br>Testis (All) – Hazardous<br>Whole blood COVID+ Symptoms+ (Hospitalized) – <b>Protective</b>                                                                                                       | MR in non-GTEX and GTEX eQTL and pQTL datasets for lung and whole blood (Baranova et al. 2022a; Hernandez Cordero et al. 2021)                                                                             |
| <i>ATP5PO</i> | Lung (Hospitalized) – Hazardous                                                                                                                                                                                                                                                                                                                                                                                                                                                                                                                                       | Associational (Li et al. 2022)                                                                                                                                                                             |
| <i>GBAP1</i>  | Breast Mammary Tissue (Susceptible) – Hazardous<br>Cultured Fibroblasts (Susceptible) – Hazardous<br>Colon Sigmoid (Susceptible) – Hazardous<br>Lung (Susceptible) – Hazardous<br>Nerve Tibial (Susceptible) – Hazardous<br>Small Intestine Terminal Ileum (Susceptible) – Hazardous<br>Stomach (Susceptible) – Hazardous                                                                                                                                                                                                                                             | MR with colocalization for splice isoform (Nakanishi et al. 2022)                                                                                                                                          |
| <i>HIP1</i>   | Breast mammary tissue (Severe) – Hazardous<br>Nerve tibial (Severe) – Hazardous<br>Whole blood COVID- Symptoms- (Severe) – <b>Protective</b>                                                                                                                                                                                                                                                                                                                                                                                                                          | None                                                                                                                                                                                                       |
| <i>IFNAR2</i> | Cells cultured fibroblasts (Severe and hospitalized) – Protective<br>Esophagus mucosa (Susceptible) – Protective<br>Whole blood COVID- Symptoms+ (Hospitalized) – Protective<br>Whole blood COVID+ Symptoms+ (Severe) – Protective                                                                                                                                                                                                                                                                                                                                    | MR with colocalization for GTEX v.7 eQTLs and pQTLs for whole-blood and lung (Baranova et al. 2021; Fricke-Galindo et al. 2022; Krishnamoorthy et al. 2023; Liu et al. 2021; Pairo-Castineira et al. 2021) |
| <i>IL10RB</i> | Cells Cultured fibroblasts (All) – <b>Protective</b><br>Esophagus Gastroesophageal junction (All) – Hazardous<br>Skeletal muscle (Susceptible) – Hazardous<br>Nerve tibial (All) – Hazardous                                                                                                                                                                                                                                                                                                                                                                          | MR with colocalization for eQTLs and pQTLs, did not study excitatory neurons (Gaziano et al. 2021)                                                                                                         |
| <i>RAB2A</i>  | Adipose subcutaneous (Hospitalized) – Hazardous<br>Artery aorta (Hospitalized) – Hazardous<br>Artery tibial (Hospitalized) – Hazardous<br>CD4 Memory Stim 40h (Hospitalized) – Hazardous<br>CD4 Naïve Stim 16h (Hospitalized) – Hazardous<br>CD4 Naïve Stim 40h (Hospitalized) – Hazardous<br>Esophagus mucosa (Hospitalized) – Hazardous<br>Esophagus muscularis (Hospitalized) – Hazardous<br>Liver (Hospitalized) – Hazardous<br>Lung (Hospitalized) – Hazardous<br>Skin not sun exposed (Hospitalized) – Hazardous<br>T naïve Stim 40h (Hospitalized) – Hazardous | MR and colocalization for pQTLs, but not for eQTLs (Pietzner et al. 2022)                                                                                                                                  |
| <i>RALGDS</i> | T effect memory Stim 16h (Severe and Susceptible) – Protective                                                                                                                                                                                                                                                                                                                                                                                                                                                                                                        | None                                                                                                                                                                                                       |
| <i>WNT3</i>   | Adrenal Gland (Hospitalized) – Hazardous<br>Artery Aorta (Severe and Hospitalized) – <b>Protective</b><br>Colon Transverse (Severe) – Hazardous<br>Nerve Tibial (Severe) – Hazardous<br>Thyroid (Severe and Hospitalized) – Hazardous                                                                                                                                                                                                                                                                                                                                 | Fine mapped (Wu et al. 2021)                                                                                                                                                                               |

488

489

*Colocalization of expression transcripts with COVID-19 outcomes is dependent on cell-type and cell-state.*

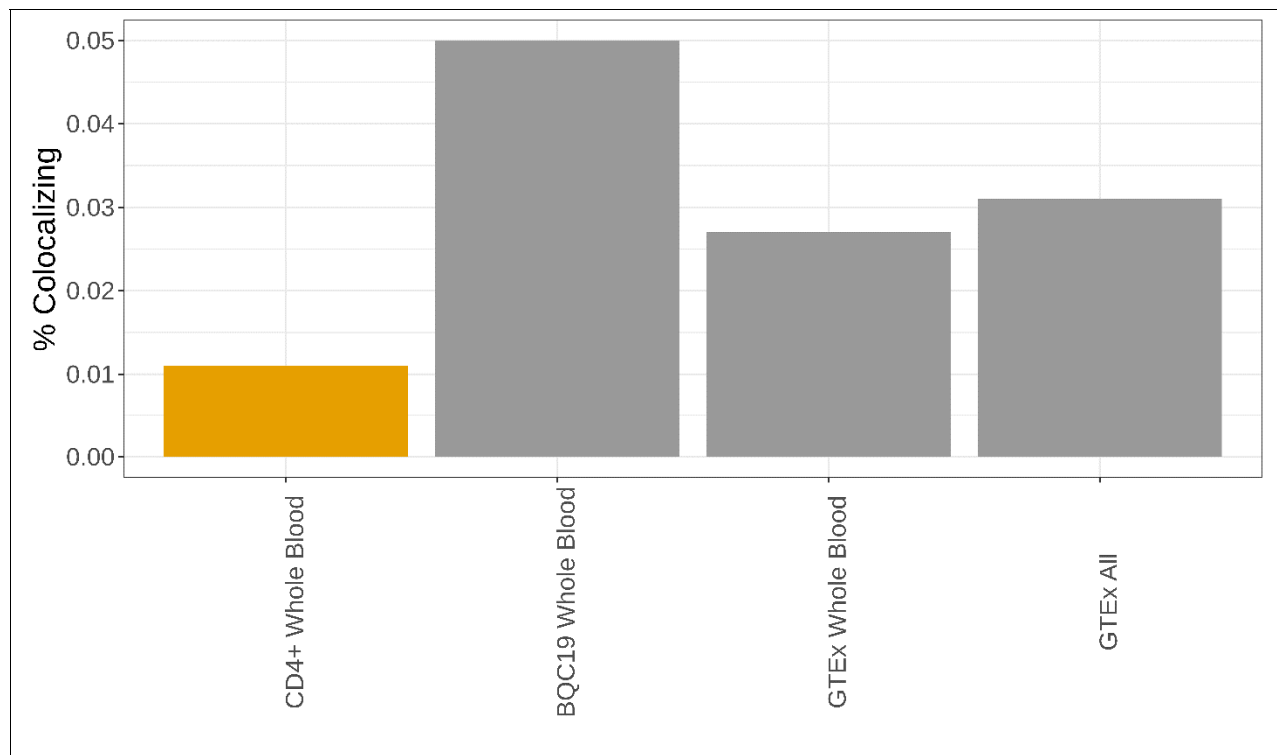

490 **Fig. 3.**

Colocalization of expression transcripts with COVID-19 outcomes is dependent on cell-type and cell-state.

491

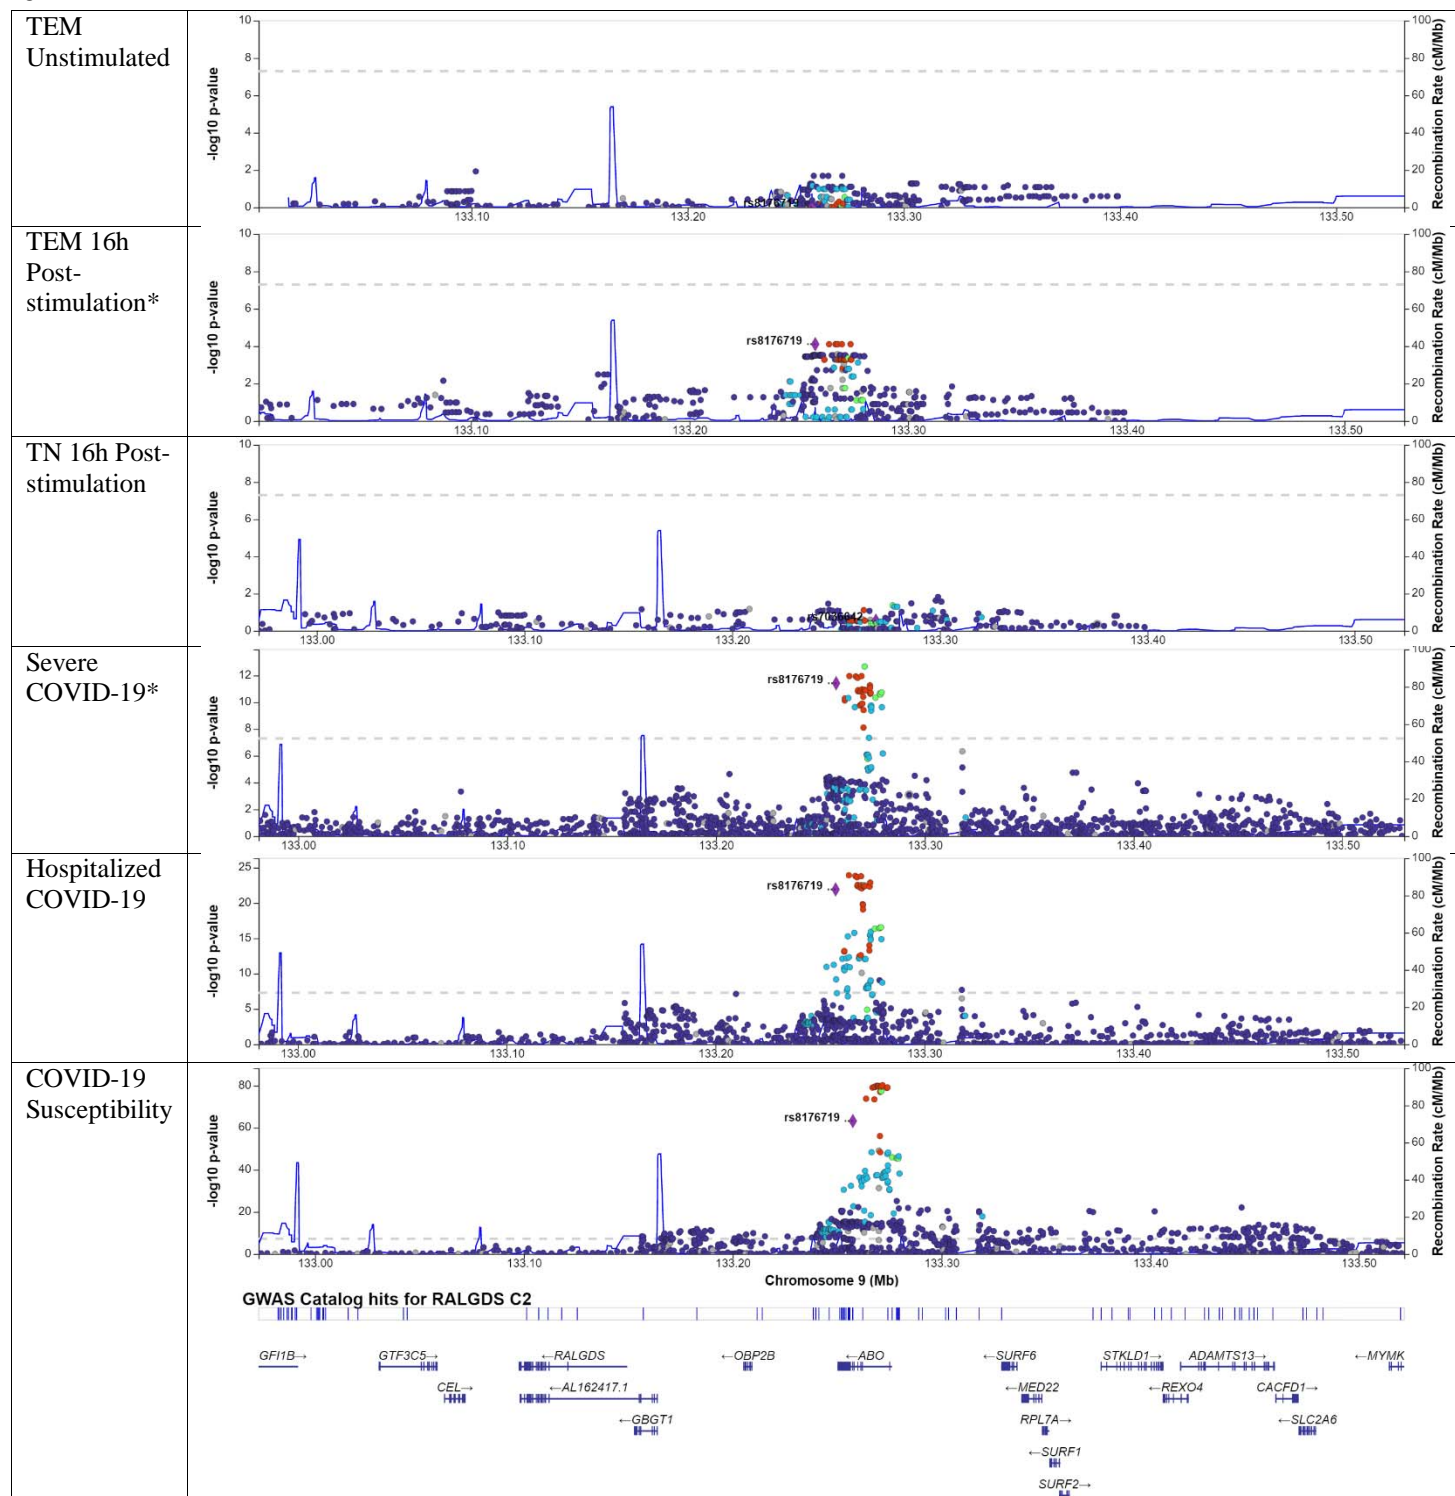

492 Fig 4.

493



*Colocalization of expression transcripts with COVID-19 outcomes is dependent on cell-type and cell-state.*

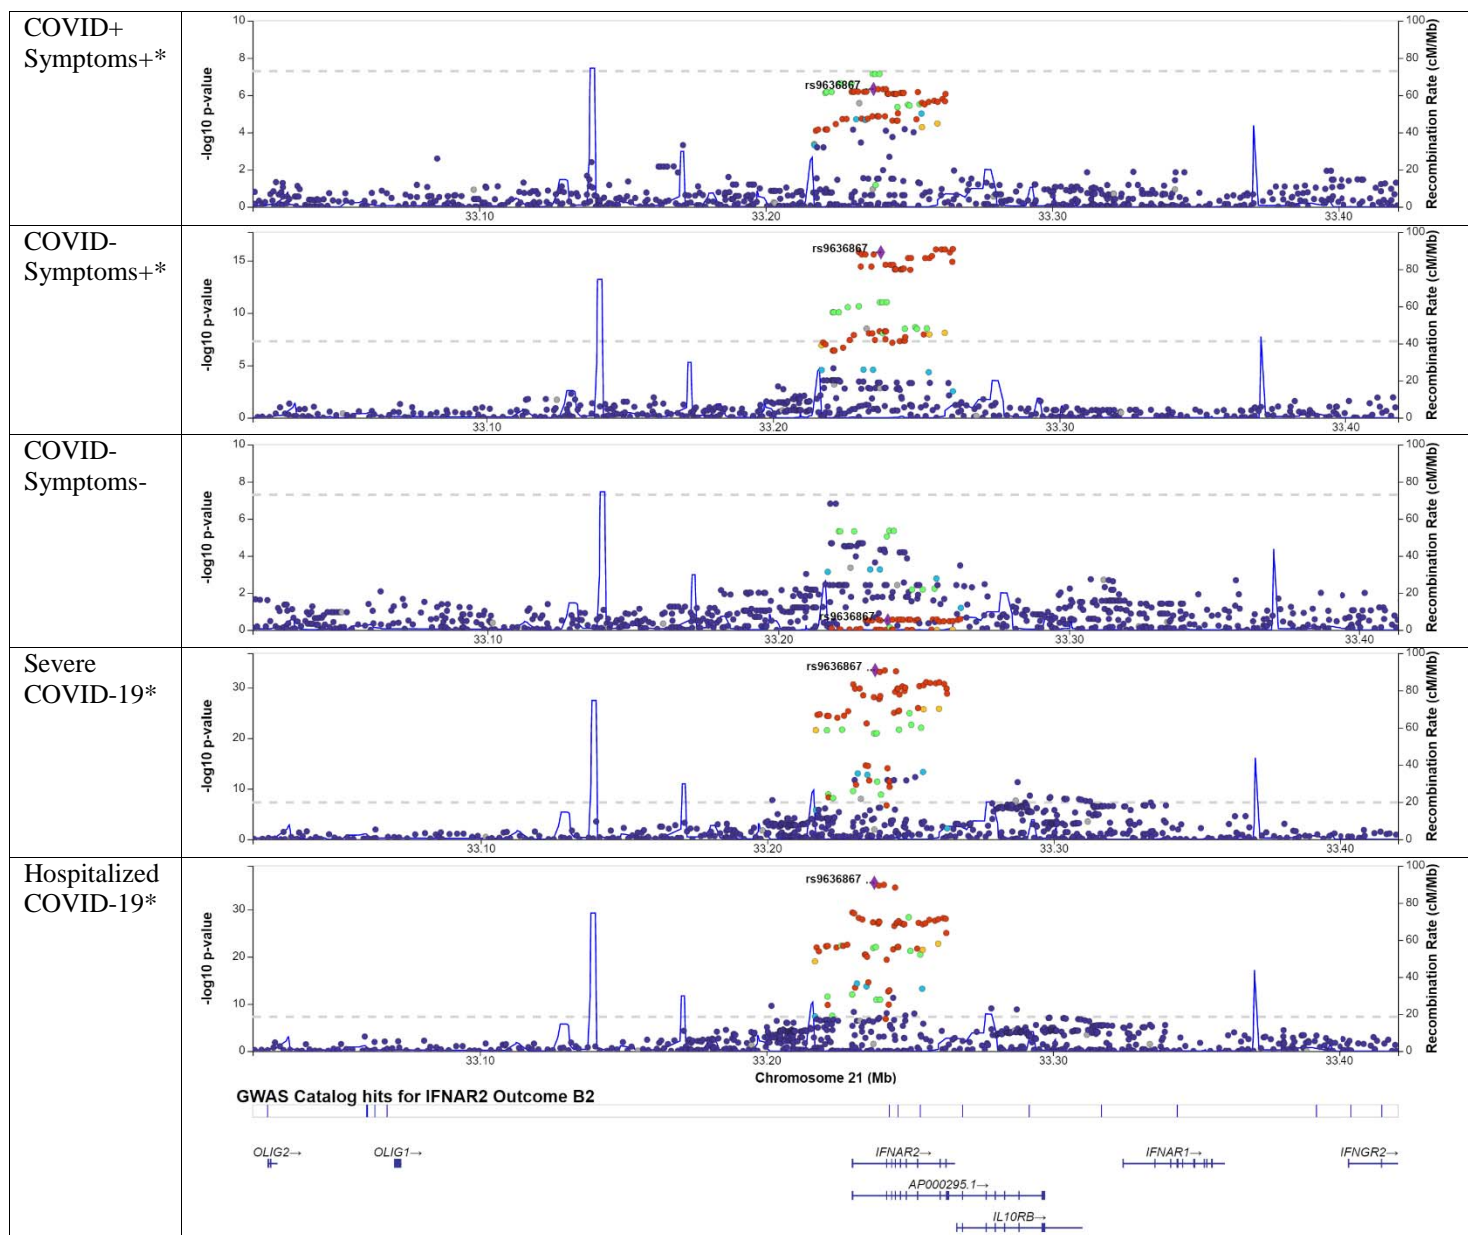

494 Fig 5.

495



*Colocalization of expression transcripts with COVID-19 outcomes is dependent on cell-type and cell-state.*

496

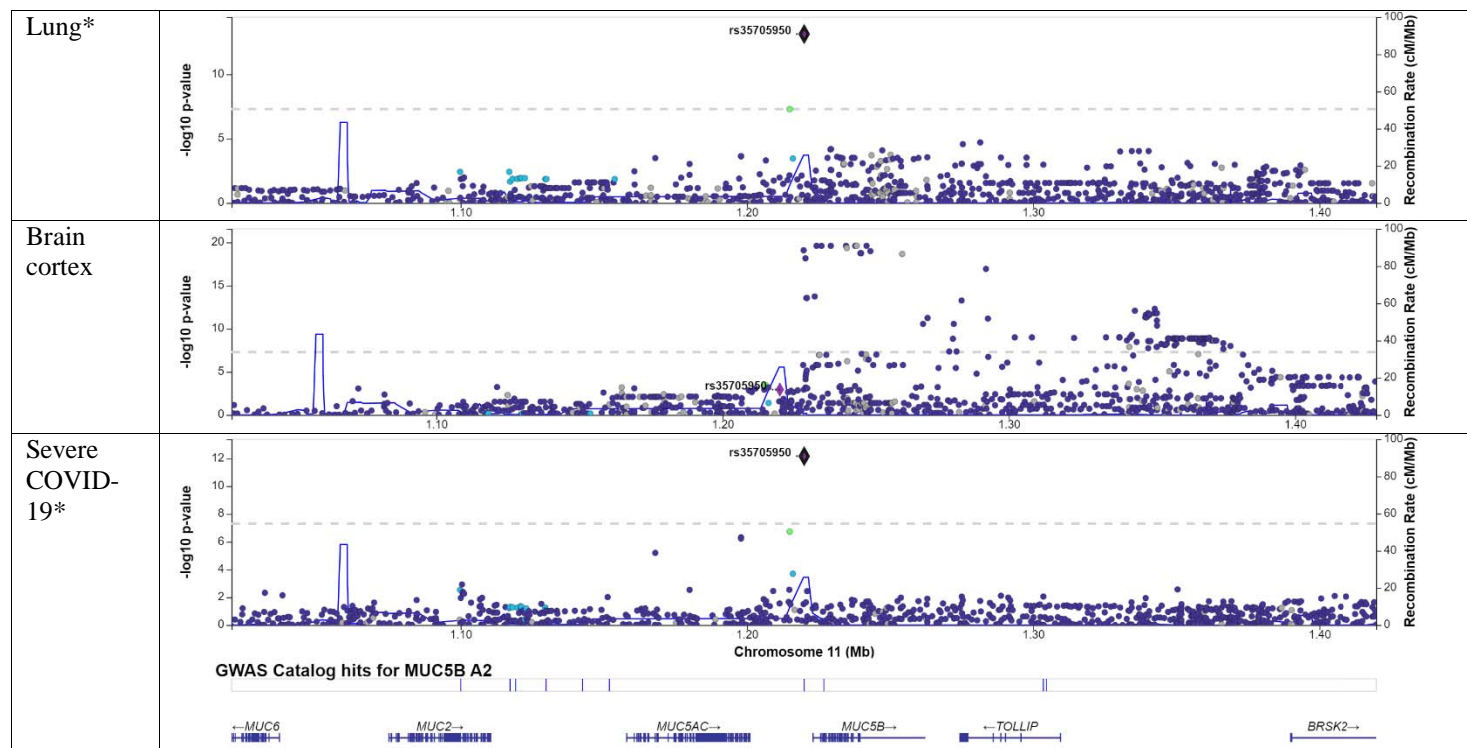

497 **Fig 6.**

498

499

*Colocalization of expression transcripts with COVID-19 outcomes is dependent on cell-type and cell-state.*

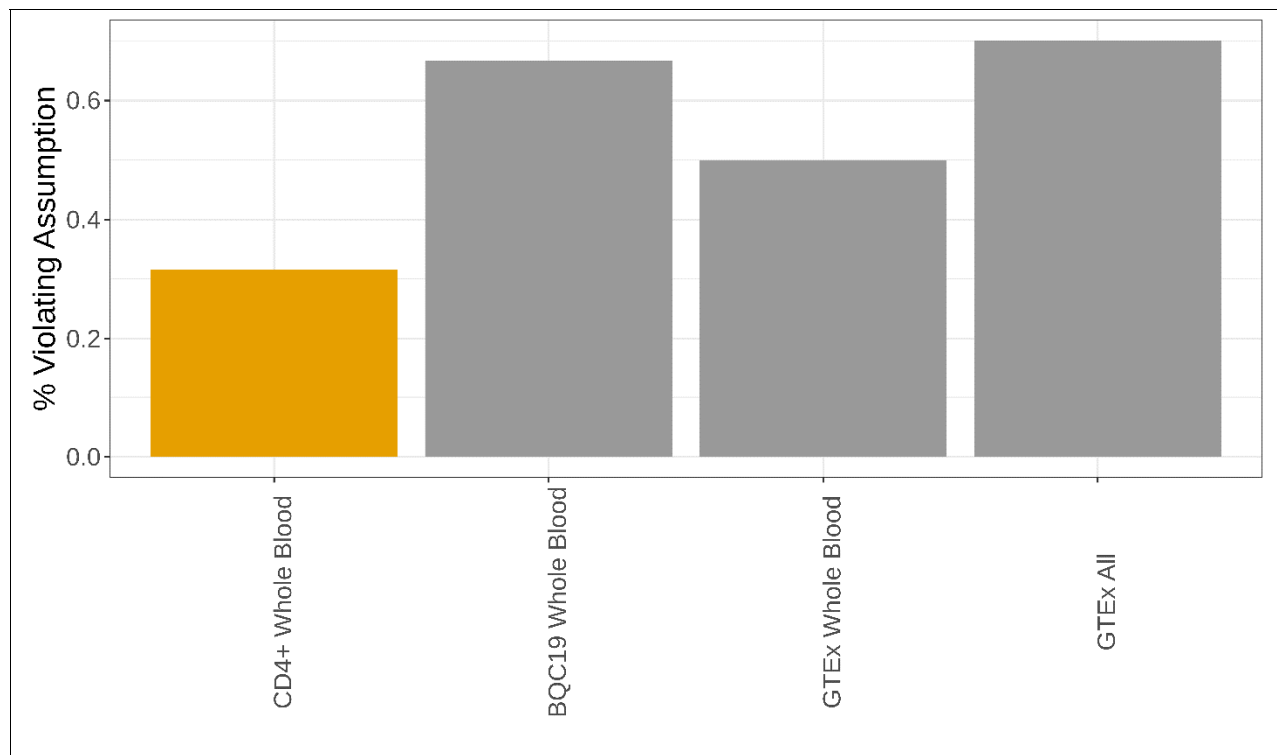

500 Fig. 7.  
501

Colocalization of expression transcripts with COVID-19 outcomes is dependent on cell-type and cell-state.

502 **Supplemental Table 2.**

| Gene                | Colocalizing cell/tissue                                                                                                                                                                                                                                                                                                                                                                                                                                        | Existing evidence                                                                                                                                                                                          |
|---------------------|-----------------------------------------------------------------------------------------------------------------------------------------------------------------------------------------------------------------------------------------------------------------------------------------------------------------------------------------------------------------------------------------------------------------------------------------------------------------|------------------------------------------------------------------------------------------------------------------------------------------------------------------------------------------------------------|
| <i>ABO</i>          | Adrenal gland (Severe) - Hazardous<br>Artery tibial (Severe) – Hazardous<br>Breast Mammary Tissue (Susceptible) – Hazardous<br>Esophagus mucosa (Susceptible) - Hazardous<br>Esophagus muscularis (Severe) - Hazardous<br>Heart Left Ventricle (Severe and Hospitalized) – Hazardous<br>Liver (Hospitalized) - Hazardous<br>Muscle skeletal (Severe) - Hazardous<br>Testis (All) - Hazardous<br>Whole blood COVID+ Symptoms+ (Hospitalized) - <b>Protective</b> | MR in non-GTEX and GTEX eQTL and pQTL datasets for lung and whole blood (Baranova et al. 2022a; Hernandez Cordero et al. 2021)                                                                             |
| <i>ADAM15</i>       | T central memory Stim 5d (Susceptible) - Hazardous                                                                                                                                                                                                                                                                                                                                                                                                              | MR with colocalization in GTEX did not observe colocalization (Wang et al. 2022)                                                                                                                           |
| <i>ATP11A</i>       | Artery Aorta (Hospitalized) - Protective                                                                                                                                                                                                                                                                                                                                                                                                                        | Fine mapping (Kousathanas et al. 2022)                                                                                                                                                                     |
| <i>ATP5PO</i>       | Lung (Hospitalized) - Hazardous                                                                                                                                                                                                                                                                                                                                                                                                                                 | Associational (Li et al. 2022)                                                                                                                                                                             |
| <i>CNPY4</i>        | Testis (Severe) - Protective                                                                                                                                                                                                                                                                                                                                                                                                                                    | None                                                                                                                                                                                                       |
| <i>COPS6</i>        | Esophagus muscularis (Hospitalized) - Protective                                                                                                                                                                                                                                                                                                                                                                                                                | None                                                                                                                                                                                                       |
| <i>DLX3</i>         | Lung (Hospitalized) - Hazardous                                                                                                                                                                                                                                                                                                                                                                                                                                 | MR with colocalization in lung (Hernandez Cordero et al. 2021)                                                                                                                                             |
| <i>DPP9</i>         | Skin sun exposed lower leg (All) - Protective                                                                                                                                                                                                                                                                                                                                                                                                                   | Associational data in blood (Sharif-Zak et al. 2022)                                                                                                                                                       |
| <i>FAM55C</i>       | Esophagus muscularis (Susceptible) - Hazardous                                                                                                                                                                                                                                                                                                                                                                                                                  | None                                                                                                                                                                                                       |
| <i>GBA</i>          | Nerve Tibial (Susceptible) - Hazardous<br>Thyroid (Susceptible) - Hazardous                                                                                                                                                                                                                                                                                                                                                                                     | None                                                                                                                                                                                                       |
| <i>GBAP1</i>        | Breast Mammary Tissue (Susceptible) - Hazardous<br>Cultured Fibroblasts (Susceptible) - Hazardous<br>Colon Sigmoid (Susceptible) - Hazardous<br>Lung (Susceptible) - Hazardous<br>Nerve Tibial (Susceptible) - Hazardous<br>Small Intestine Terminal Ileum (Susceptible) - Hazardous<br>Stomach (Susceptible) - Hazardous                                                                                                                                       | MR with colocalization for splice isoform (Nakanishi et al. 2022)                                                                                                                                          |
| <i>HIP1</i>         | Breast mammary tissue (Severe) - Hazardous<br>Nerve tibial (Severe) - Hazardous<br>Whole blood COVID- Symptoms- (Severe) - <b>Protective</b>                                                                                                                                                                                                                                                                                                                    | None                                                                                                                                                                                                       |
| <i>IFNAR2</i>       | Cells cultured fibroblasts (Severe and hospitalized) - Protective<br>Esophagus mucosa (Susceptible) - Protective<br>Whole blood COVID- Symptoms+ (Hospitalized) - Protective<br>Whole blood COVID+ Symptoms+ (Severe) - Protective                                                                                                                                                                                                                              | MR with colocalization for GTEX v.7 eQTLs and pQTLs for whole-blood and lung (Baranova et al. 2021; Fricke-Galindo et al. 2022; Krishnamoorthy et al. 2023; Liu et al. 2021; Pairo-Castineira et al. 2021) |
| <i>IL10RB</i>       | Cells Cultured fibroblasts (All) - <b>Protective</b><br>Esophagus Gastroesophageal junction (All) - Hazardous<br>Skeletal muscle (Susceptible) - Hazardous<br>Nerve tibial (All) - Hazardous                                                                                                                                                                                                                                                                    | MR with colocalization for eQTLs and pQTLs, did not study excitatory neurons (Gaziano et al. 2021)                                                                                                         |
| <i>KCNC3</i>        | Tibial nerve (Severe and Hospitalized) – Hazardous                                                                                                                                                                                                                                                                                                                                                                                                              | TWAS (Krishnamoorthy et al. 2023)                                                                                                                                                                          |
| <i>LINC01301</i>    | Breast mammary tissue (Hospitalized) – Protective<br>Skin not sun exposed (Hospitalized) - Protective                                                                                                                                                                                                                                                                                                                                                           | TWAS (Pairo-Castineira et al. 2022)                                                                                                                                                                        |
| <i>LINC02210</i>    | Artery tibial (Severe) – Protective                                                                                                                                                                                                                                                                                                                                                                                                                             | MR with colocalization (Baranova et al. 2021)                                                                                                                                                              |
| <i>Lnc-INTS12-1</i> | Artery aorta (Severe) – Protective<br>Thyroid (Severe) - Protective                                                                                                                                                                                                                                                                                                                                                                                             | None                                                                                                                                                                                                       |
| <i>Lnc-THBS3-1</i>  | Whole blood COVID- Symptoms- (Susceptible) - Protective                                                                                                                                                                                                                                                                                                                                                                                                         | None                                                                                                                                                                                                       |
| <i>MAMSTR</i>       | Skin Sun Exposed (Hospitalized) – Protective                                                                                                                                                                                                                                                                                                                                                                                                                    | TWAS (Krishnamoorthy et al. 2023)                                                                                                                                                                          |

*Colocalization of expression transcripts with COVID-19 outcomes is dependent on cell-type and cell-state.*

|                 |                                                                                                                                                                                                                                                                                                                                                                                                                                                                                                                                                                       |                                                                                           |
|-----------------|-----------------------------------------------------------------------------------------------------------------------------------------------------------------------------------------------------------------------------------------------------------------------------------------------------------------------------------------------------------------------------------------------------------------------------------------------------------------------------------------------------------------------------------------------------------------------|-------------------------------------------------------------------------------------------|
| <i>MUC1</i>     | Nerve tibial (Severe and Hospitalized) - Hazardous                                                                                                                                                                                                                                                                                                                                                                                                                                                                                                                    | MR from GTEx v.7 against HGI release 6 found signal in blood (Krishnamoorthy et al. 2023) |
| <i>MUC5B</i>    | Lung (Severe) - Protective                                                                                                                                                                                                                                                                                                                                                                                                                                                                                                                                            | MR only for lung eQTLs GTEx release 7 (Liu et al. 2021)                                   |
| <i>NAPSA</i>    | CD4 Naïve Stim 40h (Susceptible) - Hazardous<br>Esophageal mucosa (Severe and Hospitalized) - <b>Protective</b><br>T effector memory Stim 40h (All) - Hazardous<br>T naïve (Hospitalized and Susceptible) - Hazardous<br>Testis (Hospitalized) - <b>Protective</b>                                                                                                                                                                                                                                                                                                    | MR with colocalization for eQTLs, did not study CD4+ T cells (Degenhardt et al. 2022)     |
| <i>NAPSB</i>    | Artery Coronary (Susceptible) - Protective                                                                                                                                                                                                                                                                                                                                                                                                                                                                                                                            | None                                                                                      |
| <i>NTN5</i>     | Colon sigmoid (Hospitalized) - Protective<br>Esophageal Gastroesophageal junction (Hospitalized) - Protective<br>Esophagus mucosa (Severe and Hospitalized) - Protective                                                                                                                                                                                                                                                                                                                                                                                              | None                                                                                      |
| <i>OAS1</i>     | Adipose subcutaneous (Hospitalized) - Protective<br>Artery tibial (Susceptible) - Protective<br>Esophagus mucosa (Hospitalized) - <b>Hazardous</b><br>Nerve tibial (Susceptible) - <b>Hazardous</b><br>Skin not sun exposed (Severe and Susceptible) - Protective<br>Skin sun exposed (All) - Protective                                                                                                                                                                                                                                                              | MR with colocalization of eQTL and pQTL (Zhou et al. 2021)                                |
| <i>PDCL3P4</i>  | Brain Caudate Basal Ganglia (Susceptible)                                                                                                                                                                                                                                                                                                                                                                                                                                                                                                                             | Colocalization (D'Antonio et al. 2021)                                                    |
| <i>RAB2A</i>    | Adipose subcutaneous (Hospitalized) - Hazardous<br>Artery aorta (Hospitalized) - Hazardous<br>Artery tibial (Hospitalized) - Hazardous<br>CD4 Memory Stim 40h (Hospitalized) - Hazardous<br>CD4 Naïve Stim 16h (Hospitalized) - Hazardous<br>CD4 Naïve Stim 40h (Hospitalized) - Hazardous<br>Esophagus mucosa (Hospitalized) - Hazardous<br>Esophagus muscularis (Hospitalized) - Hazardous<br>Liver (Hospitalized) - Hazardous<br>Lung (Hospitalized) - Hazardous<br>Skin not sun exposed (Hospitalized) - Hazardous<br>T naïve Stim 40h (Hospitalized) - Hazardous | MR and colocalization for pQTLs, but not for eQTLs (Pietzner et al. 2022)                 |
| <i>RALGDS</i>   | T effect memory Stim 16h (Severe and Susceptible) - Protective                                                                                                                                                                                                                                                                                                                                                                                                                                                                                                        | None                                                                                      |
| <i>RASIP1</i>   | Esophageal Gastroesophageal junction (Severe and Hospitalized) - Protective<br>Esophagus muscularis (Severe) - Protective                                                                                                                                                                                                                                                                                                                                                                                                                                             | None                                                                                      |
| <i>SLC22A31</i> | Heart left ventricle (Severe and Hospitalized) – Hazardous                                                                                                                                                                                                                                                                                                                                                                                                                                                                                                            | PheWAS linked (Covid-19 Host Genetics Initiative 2022)                                    |
| <i>SLC6A20</i>  | Breast mammary tissue (Severe and Hospitalized) – Hazardous                                                                                                                                                                                                                                                                                                                                                                                                                                                                                                           | GWAS (Severe Covid et al. 2020)                                                           |
| <i>WNT3</i>     | Adrenal Gland (Hospitalized) - Hazardous<br>Artery Aorta (Severe and Hospitalized) - <b>Protective</b><br>Colon Transverse (Severe) - Hazardous<br>Nerve Tibial (Severe) - Hazardous<br>Thyroid (Severe and Hospitalized) - Hazardous                                                                                                                                                                                                                                                                                                                                 | Fine mapped (Wu et al. 2021)                                                              |

503

504 **References:**

505

506 Baranova A, Cao H, Chen J, Zhang F (2022a) Causal Association and Shared Genetics Between Asthma  
507 and COVID-19. *Front Immunol* 13: 705379. doi: 10.3389/fimmu.2022.705379

508 Baranova A, Cao H, Teng S, Zhang F (2023) A phenome-wide investigation of risk factors for severe  
509 COVID-19. *J Med Virol* 95: e28264. doi: 10.1002/jmv.28264

510 Baranova A, Cao H, Zhang F (2021) Unraveling Risk Genes of COVID-19 by Multi-Omics Integrative

511 Analyses. *Front Med (Lausanne)* 8: 738687. doi: 10.3389/fmed.2021.738687

*Colocalization of expression transcripts with COVID-19 outcomes is dependent on cell-type and cell-state.*

- 512 Baranova A, Cao H, Zhang F (2022b) Severe COVID-19 increases the risk of schizophrenia. *Psychiatry*  
513 Res 317: 114809. doi: 10.1016/j.psychres.2022.114809
- 514 Connally NJ, Nazeen S, Lee D, Shi H, Stamatoyannopoulos J, Chun S, Cotsapas C, Cassa CA, Sunyaev  
515 SR (2022) The missing link between genetic association and regulatory function. *Elife* 11. doi:  
516 10.7554/eLife.74970
- 517 Covid-19 Host Genetics Initiative (2021) Mapping the human genetic architecture of COVID-19. *Nature*  
518 600: 472-477. doi: 10.1038/s41586-021-03767-x
- 519 Covid-19 Host Genetics Initiative (2022) A first update on mapping the human genetic architecture of  
520 COVID-19. *Nature* 608: E1-E10. doi: 10.1038/s41586-022-04826-7
- 521 D'Antonio M, Nguyen JP, Arthur TD, Matsui H, Initiative C-HG, D'Antonio-Chronowska A, Frazer KA  
522 (2021) SARS-CoV-2 susceptibility and COVID-19 disease severity are associated with genetic  
523 variants affecting gene expression in a variety of tissues. *Cell Rep* 37: 110020. doi:  
524 10.1016/j.celrep.2021.110020
- 525 Davies NM, Holmes MV, Davey Smith G (2018) Reading Mendelian randomisation studies: a guide,  
526 glossary, and checklist for clinicians. *BMJ* 362: k601. doi: 10.1136/bmj.k601
- 527 De Biasi S, Meschiari M, Gibellini L, Bellinazzi C, Borella R, Fianza L, Gozzi L, Iannone A, Lo Tartaro  
528 D, Mattioli M, Paolini A, Menozzi M, Milic J, Franceschi G, Fantini R, Tonelli R, Sita M, Sarti  
529 M, Trenti T, Brugioni L, Cicchetti L, Facchinetti F, Pietrangelo A, Clini E, Girardis M, Guaraldi  
530 G, Mussini C, Cossarizza A (2020) Marked T cell activation, senescence, exhaustion and skewing  
531 towards TH17 in patients with COVID-19 pneumonia. *Nat Commun* 11: 3434. doi:  
532 10.1038/s41467-020-17292-4
- 533 Degenhardt F, Ellinghaus D, Juzenas S, Lerga-Jaso J, Wendorff M, Maya-Miles D, Uellendahl-Werth F,  
534 ElAbd H, Ruhlemann MC, Arora J, Ozer O, Lenning OB, Myhre R, Vadla MS, Wacker EM,  
535 Wienbrandt L, Blandino Ortiz A, de Salazar A, Garrido Chercoles A, Palom A, Ruiz A, Garcia-  
536 Fernandez AE, Blanco-Grau A, Mantovani A, Zanella A, Holten AR, Mayer A, Bandera A,  
537 Cherubini A, Protti A, Aghemo A, Gerussi A, Ramirez A, Braun A, Nebel A, Barreira A, Lleo A,  
538 Teles A, Kildal AB, Biondi A, Caballero-Garralda A, Ganna A, Gori A, Gluck A, Lind A, Tanck  
539 A, Hinney A, Carreras Nolla A, Fracanzani AL, Peschuck A, Cavallero A, Dyrhol-Riise AM,  
540 Ruello A, Julia A, Muscatello A, Pesenti A, Voza A, Rando-Segura A, Solier A, Schmidt A,  
541 Cortes B, Mateos B, Nafria-Jimenez B, Schaefer B, Jensen B, Bellinghausen C, Maj C, Ferrando  
542 C, de la Horra C, Quereda C, Skurk C, Thibeault C, Scollo C, Herr C, Spinner CD, Gassner C,  
543 Lange C, Hu C, Paccapelo C, Lehmann C, Angelini C, Cappadona C, Azuure C, Covicat study  
544 group AS, Bianco C, Cea C, Sancho C, Hoff DAL, Galimberti D, Prati D, Haschka D, Jimenez D,  
545 Pestana D, Toapanta D, Muniz-Diaz E, Azzolini E, Sandoval E, Binatti E, Scarpini E, Helbig ET,  
546 et al. (2022) Detailed stratified GWAS analysis for severe COVID-19 in four European  
547 populations. *Hum Mol Genet* 31: 3945-3966. doi: 10.1093/hmg/ddac158
- 548 Forgetta V, Jiang L, Vulpescu NA, Hogan MS, Chen S, Morris JA, Grinek S, Benner C, Jang DK, Hoang  
549 Q, Burt N, Flannick JA, McCarthy MI, Fauman E, Greenwood CMT, Maurano MT, Richards JB  
550 (2022) An effector index to predict target genes at GWAS loci. *Hum Genet*. doi: 10.1007/s00439-  
551 022-02434-z
- 552 Fricke-Galindo I, Martinez-Morales A, Chavez-Galan L, Ocana-Guzman R, Buendia-Roldan I, Perez-  
553 Rubio G, Hernandez-Zenteno RJ, Veronica-Aguilar A, Alarcon-Dionet A, Aguilar-Duran H,  
554 Gutierrez-Perez IA, Zaragoza-Garcia O, Alanis-Ponce J, Camarena A, Bautista-Becerril B, Nava-  
555 Quiroz KJ, Mejia M, Guzman-Guzman IP, Falfan-Valencia R (2022) IFNAR2 relevance in the  
556 clinical outcome of individuals with severe COVID-19. *Front Immunol* 13: 949413. doi:  
557 10.3389/fimmu.2022.949413
- 558 Gaziano L, Giambartolomei C, Pereira AC, Gaulton A, Posner DC, Swanson SA, Ho YL, Iyengar SK,  
559 Kosik NM, Vujkovic M, Gagnon DR, Bento AP, Barrio-Hernandez I, Ronnblom L, Hagberg N,  
560 Lundtoft C, Langenberg C, Pietzner M, Valentine D, Gustincich S, Tartaglia GG, Allara E,  
561 Surendran P, Burgess S, Zhao JH, Peters JE, Prins BP, Angelantonio ED, Devineni P, Shi Y,  
562 Lynch KE, DuVall SL, Garcon H, Thomann LO, Zhou JJ, Gorman BR, Huffman JE, O'Donnell



*Colocalization of expression transcripts with COVID-19 outcomes is dependent on cell-type and cell-state.*

- 563 CJ, Tsao PS, Beckham JC, Pyarajan S, Muralidhar S, Huang GD, Ramoni R, Beltrao P, Danesh J,  
564 Hung AM, Chang KM, Sun YV, Joseph J, Leach AR, Edwards TL, Cho K, Gaziano JM,  
565 Butterworth AS, Casas JP, Initiative VAMVPC-S (2021) Actionable druggable genome-wide  
566 Mendelian randomization identifies repurposing opportunities for COVID-19. *Nat Med* 27: 668-  
567 676. doi: 10.1038/s41591-021-01310-z
- 568 GTEx Consortium (2020) The GTEx Consortium atlas of genetic regulatory effects across human tissues.  
569 *Science* 369: 1318-1330. doi: 10.1126/science.aaz1776
- 570 Hernandez Cordero AI, Li X, Milne S, Yang CX, Bosse Y, Joubert P, Timens W, van den Berge M,  
571 Nickle D, Hao K, Sin DD (2021) Multi-omics highlights ABO plasma protein as a causal risk  
572 factor for COVID-19. *Hum Genet* 140: 969-979. doi: 10.1007/s00439-021-02264-5
- 573 Kanai M, Elzur R, Zhou W, Global Biobank Meta-analysis I, Daly MJ, Finucane HK (2022) Meta-  
574 analysis fine-mapping is often miscalibrated at single-variant resolution. *Cell Genom* 2. doi:  
575 10.1016/j.xgen.2022.100210
- 576 Kanai M, Ulirsch JC, Karjalainen J, Kurki M, Karczewski KJ, Fauman E, Wang QS, Jacobs H, Aguet F,  
577 Ardlie KG, Kerimov N, Alasoo K, Benner C, Ishigaki K, Sakaue S, Reilly S, Kamatani Y,  
578 Matsuda K, Palotie A, Neale BM, Tewhey R, Sabeti PC, Okada Y, Daly MJ, Finucane HK (2021)  
579 Insights from complex trait fine-mapping across diverse populations. medRxiv. doi:  
580 10.1101/2021.09.03.21262975
- 581 Kousathanas A, Pairo-Castineira E, Rawlik K, Stuckey A, Odhams CA, Walker S, Russell CD,  
582 Malinauskas T, Wu Y, Millar J, Shen X, Elliott KS, Griffiths F, Oosthuyzen W, Morrice K,  
583 Keating S, Wang B, Rhodes D, Klaric L, Zechner M, Parkinson N, Siddiq A, Goddard P,  
584 Donovan S, Maslove D, Nichol A, Semple MG, Zainy T, Maleady-Crowe F, Todd L, Salehi S,  
585 Knight J, Elgar G, Chan G, Arumugam P, Patch C, Rendon A, Bentley D, Kingsley C, Kosmicki  
586 JA, Horowitz JE, Baras A, Abecasis GR, Ferreira MAR, Justice A, Mirshahi T, Oetjens M, Rader  
587 DJ, Ritchie MD, Verma A, Fowler TA, Shankar-Hari M, Summers C, Hinds C, Horby P, Ling L,  
588 McAuley D, Montgomery H, Openshaw PJM, Elliott P, Walsh T, Tenesa A, Gen OI, and Me i,  
589 Initiative C-HG, Fawkes A, Murphy L, Rowan K, Ponting CP, Vitart V, Wilson JF, Yang J,  
590 Bretherick AD, Scott RH, Hendry SC, Moutsianas L, Law A, Caulfield MJ, Baillie JK (2022)  
591 Whole-genome sequencing reveals host factors underlying critical COVID-19. *Nature* 607: 97-  
592 103. doi: 10.1038/s41586-022-04576-6
- 593 Krishnamoorthy S, Li GH, Cheung CL (2023) Transcriptome-wide summary data-based Mendelian  
594 randomization analysis reveals 38 novel genes associated with severe COVID-19. *J Med Virol*  
595 95: e28162. doi: 10.1002/jmv.28162
- 596 Kundu R, Narean JS, Wang L, Fenn J, Pillay T, Fernandez ND, Conibear E, Koycheva A, Davies M,  
597 Tolosa-Wright M, Hakki S, Varro R, McDermott E, Hammett S, Cutajar J, Thwaites RS, Parker  
598 E, Rosadas C, McClure M, Tedder R, Taylor GP, Dunning J, Lalvani A (2022) Cross-reactive  
599 memory T cells associate with protection against SARS-CoV-2 infection in COVID-19 contacts.  
600 *Nat Commun* 13: 80. doi: 10.1038/s41467-021-27674-x
- 601 Lamontagne M, Berube JC, Obeidat M, Cho MH, Hobbs BD, Sakornsakolpat P, de Jong K, Boezen HM,  
602 International CGC, Nickle D, Hao K, Timens W, van den Berge M, Joubert P, Laviolette M, Sin  
603 DD, Pare PD, Bosse Y (2018) Leveraging lung tissue transcriptome to uncover candidate causal  
604 genes in COPD genetic associations. *Hum Mol Genet* 27: 1819-1829. doi: 10.1093/hmg/ddy091
- 605 Li P, Ke Y, Shen W, Shi S, Wang Y, Lin K, Guo X, Wang C, Zhang Y, Zhao Z (2022) Targeted  
606 screening of genetic associations with COVID-19 susceptibility and severity. *Front Genet* 13:  
607 1073880. doi: 10.3389/fgene.2022.1073880
- 608 Liu D, Yang J, Feng B, Lu W, Zhao C, Li L (2021) Mendelian randomization analysis identified genes  
609 pleiotropically associated with the risk and prognosis of COVID-19. *J Infect* 82: 126-132. doi:  
610 10.1016/j.jinf.2020.11.031
- 611 Mathew D, Giles JR, Baxter AE, Oldridge DA, Greenplate AR, Wu JE, Alanio C, Kuri-Cervantes L,  
612 Pampena MB, D'Andrea K, Manne S, Chen Z, Huang YJ, Reilly JP, Weisman AR, Ittner CAG,  
613 Kuthuru O, Dougherty J, Nzingha K, Han N, Kim J, Pattekar A, Goodwin EC, Anderson EM,

*Colocalization of expression transcripts with COVID-19 outcomes is dependent on cell-type and cell-state.*

- 614 Weirick ME, Gouma S, Arevalo CP, Bolton MJ, Chen F, Lacey SF, Ramage H, Cherry S,  
615 Hensley SE, Apostolidis SA, Huang AC, Vella LA, Unit UCP, Betts MR, Meyer NJ, Wherry EJ  
616 (2020) Deep immune profiling of COVID-19 patients reveals distinct immunotypes with  
617 therapeutic implications. *Science* 369. doi: 10.1126/science.abc8511
- 618 Mehandru S, Merad M (2022) Pathological sequelae of long-haul COVID. *Nat Immunol* 23: 194-202.  
619 doi: 10.1038/s41590-021-01104-y
- 620 Merad M, Blish CA, Sallusto F, Iwasaki A (2022) The immunology and immunopathology of COVID-  
621 19. *Science* 375: 1122-1127. doi: 10.1126/science.abm8108
- 622 Nakanishi T, Farjoun Y, Willett J, Allen RJ, Guillen-Guio B, Zhou S, Richards JB (2022) Alternative  
623 splicing in the lung influences COVID-19 severity and respiratory diseases. medRxiv. doi:  
624 10.1101/2022.10.18.22281202
- 625 Ong EZ, Chan YFZ, Leong WY, Lee NMY, Kalimuddin S, Haja Mohideen SM, Chan KS, Tan AT,  
626 Bertoletti A, Ooi EE, Low JGH (2020) A Dynamic Immune Response Shapes COVID-19  
627 Progression. *Cell Host Microbe* 27: 879-882 e2. doi: 10.1016/j.chom.2020.03.021
- 628 Pairo-Castineira E, Clohisey S, Klaric L, Bretherick AD, Rawlik K, Pasko D, Walker S, Parkinson N,  
629 Fourman MH, Russell CD, Furniss J, Richmond A, Gountouna E, Wrobel N, Harrison D, Wang  
630 B, Wu Y, Meynert A, Griffiths F, Oosthuyzen W, Kousathanas A, Moutsianas L, Yang Z, Zhai R,  
631 Zheng C, Grimes G, Beale R, Millar J, Shih B, Keating S, Zechner M, Haley C, Porteous DJ,  
632 Hayward C, Yang J, Knight J, Summers C, Shankar-Hari M, Klenerman P, Turtle L, Ho A,  
633 Moore SC, Hinds C, Horby P, Nichol A, Maslove D, Ling L, McAuley D, Montgomery H, Walsh  
634 T, Pereira AC, Renieri A, Gen OI, Investigators IC, Initiative C-HG, and Me I, Investigators B,  
635 Gen CI, Shen X, Ponting CP, Fawkes A, Tenesa A, Caulfield M, Scott R, Rowan K, Murphy L,  
636 Openshaw PJM, Semple MG, Law A, Vitart V, Wilson JF, Baillie JK (2021) Genetic  
637 mechanisms of critical illness in COVID-19. *Nature* 591: 92-98. doi: 10.1038/s41586-020-03065-  
638 y
- 639 Pairo-Castineira E, Rawlik K, Klaric L, Kousathanas A, Richmond A, Millar J, Russell CD, Malinauskas  
640 T, Thwaites R, Stuckey A, Odhams CA, Walker S, Griffiths F, Oosthuyzen W, Morrice K,  
641 Keating S, Nichol A, Semple MG, Knight J, Shankar-Hari M, Summers C, Hinds C, Horby P,  
642 Ling L, McAuley D, Montgomery H, Openshaw PJM, Walsh T, Tenesa A, Scott RH, Caulfield  
643 MJ, Moutsianas L, Ponting CP, Wilson JF, Vitart V, Pereira AC, Luchessi A, Parra E, Cruz-  
644 Guerrero R, Carracedo A, Fawkes A, Murphy L, Rowan K, Law A, Hendry SC, Baillie JK (2022)  
645 GWAS and meta-analysis identifies multiple new genetic mechanisms underlying severe Covid-  
646 19. medRxiv. doi: 10.1101/2022.03.07.22271833
- 647 Pietzner M, Chua RL, Wheeler E, Jechow K, Willett JDS, Radbruch H, Trump S, Heidecker B, Zeberg H,  
648 Heppner FL, Eils R, Mall MA, Richards JB, Sander LE, Lehmann I, Lukassen S, Wareham NJ,  
649 Conrad C, Langenberg C (2022) ELF5 is a potential respiratory epithelial cell-specific risk gene  
650 for severe COVID-19. *Nat Commun* 13: 4484. doi: 10.1038/s41467-022-31999-6
- 651 Pruim RJ, Welch RP, Sanna S, Teslovich TM, Chines PS, Gliedt TP, Boehnke M, Abecasis GR, Willer  
652 CJ (2010) LocusZoom: regional visualization of genome-wide association scan results.  
653 *Bioinformatics* 26: 2336-7. doi: 10.1093/bioinformatics/btq419
- 654 Randolph HE, Fiege JK, Thielen BK, Mickelson CK, Shiratori M, Barroso-Batista J, Langlois RA,  
655 Barreiro LB (2021) Genetic ancestry effects on the response to viral infection are pervasive but  
656 cell type specific. *Science* 374: 1127-1133. doi: 10.1126/science.abg0928
- 657 Rocheleau G, Forrest IS, Duffy A, Bafna S, Dobbyn A, Verbanck M, Won HH, Jordan DM, Do R (2022)  
658 A tissue-level phenome-wide network map of colocalized genes and phenotypes in the UK  
659 Biobank. *Commun Biol* 5: 849. doi: 10.1038/s42003-022-03820-z
- 660 Schmiedel BJ, Rocha J, Gonzalez-Colin C, Bhattacharyya S, Madrigal A, Ottensmeier CH, Ay F,  
661 Chandra V, Vijayanand P (2021) COVID-19 genetic risk variants are associated with expression  
662 of multiple genes in diverse immune cell types. *Nat Commun* 12: 6760. doi: 10.1038/s41467-  
663 021-26888-3

*Colocalization of expression transcripts with COVID-19 outcomes is dependent on cell-type and cell-state.*

- 664 Severe Covid GG, Ellinghaus D, Degenhardt F, Bujanda L, Buti M, Albillos A, Invernizzi P, Fernandez J,  
665 Prati D, Baselli G, Asselta R, Grimsrud MM, Milani C, Aziz F, Kassens J, May S, Wendorff M,  
666 Wienbrandt L, Uellendahl-Werth F, Zheng T, Yi X, de Pablo R, Chercoles AG, Palom A, Garcia-  
667 Fernandez AE, Rodriguez-Frias F, Zanella A, Bandera A, Protti A, Aghemo A, Lleo A, Biondi A,  
668 Caballero-Garralda A, Gori A, Tanck A, Carreras Nolla A, Latiano A, Fracanzani AL, Peschuck  
669 A, Julia A, Pesenti A, Voza A, Jimenez D, Mateos B, Nafria Jimenez B, Quereda C, Paccapelo C,  
670 Gassner C, Angelini C, Cea C, Solier A, Pestana D, Muniz-Diaz E, Sandoval E, Paraboschi EM,  
671 Navas E, Garcia Sanchez F, Ceriotti F, Martinelli-Boneschi F, Peyvandi F, Blasi F, Tellez L,  
672 Blanco-Grau A, Hemmrich-Stanisak G, Grasselli G, Costantino G, Cardamone G, Foti G, Aneli  
673 S, Kurihara H, ElAbd H, My I, Galvan-Femenia I, Martin J, Erdmann J, Ferrusquia-Acosta J,  
674 Garcia-Etxebarria K, Izquierdo-Sanchez L, Bettini LR, Sumoy L, Terranova L, Moreira L,  
675 Santoro L, Scudeller L, Mesonero F, Roade L, Ruhlemann MC, Schaefer M, Carrabba M,  
676 Riveiro-Barciela M, Figuera Basso ME, Valsecchi MG, Hernandez-Tejero M, Acosta-Herrera M,  
677 D'Angio M, Baldini M, Cazzaniga M, Schulzky M, Cecconi M, Wittig M, et al. (2020)  
678 Genomewide Association Study of Severe Covid-19 with Respiratory Failure. *N Engl J Med* 383:  
679 1522-1534. doi: 10.1056/NEJMoa2020283
- 680 Sharif-Zak M, Abbasi-Jorjandi M, Asadikaram G, Ghoreishi ZA, Rezazadeh-Jabalbarzi M, Afsharipur A,  
681 Rashidinejad H, Khajepour F, Jafarzadeh A, Arefinia N, Kheyrkhah A, Abolhassani M (2022)  
682 CCR2 and DPP9 expression in the peripheral blood of COVID-19 patients: Influences of the  
683 disease severity and gender. *Immunobiology* 227: 152184. doi: 10.1016/j.imbio.2022.152184
- 684 Skrivankova VW, Richmond RC, Woolf BAR, Yarmolinsky J, Davies NM, Swanson SA, VanderWeele  
685 TJ, Higgins JPT, Timpson NJ, Dimou N, Langenberg C, Golub RM, Loder EW, Gallo V,  
686 Tybjaerg-Hansen A, Davey Smith G, Egger M, Richards JB (2021) Strengthening the Reporting  
687 of Observational Studies in Epidemiology Using Mendelian Randomization: The STROBE-MR  
688 Statement. *JAMA* 326: 1614-1621. doi: 10.1001/jama.2021.18236
- 689 Smith GD, Ebrahim S (2003) 'Mendelian randomization': can genetic epidemiology contribute to  
690 understanding environmental determinants of disease? *Int J Epidemiol* 32: 1-22. doi:  
691 10.1093/ije/dyg070
- 692 Soskic B, Cano-Gamez E, Smyth DJ, Ambridge K, Ke Z, Matte JC, Bossini-Castillo L, Kaplanis J,  
693 Ramirez-Navarro L, Lorenc A, Nakic N, Esparza-Gordillo J, Rowan W, Wille D, Tough DF,  
694 Bronson PG, Trynka G (2022) Immune disease risk variants regulate gene expression dynamics  
695 during CD4(+) T cell activation. *Nat Genet*. doi: 10.1038/s41588-022-01066-3
- 696 Tan LY, Komarasamy TV, Rmt Balasubramaniam V (2021) Hyperinflammatory Immune Response and  
697 COVID-19: A Double Edged Sword. *Front Immunol* 12: 742941. doi:  
698 10.3389/fimmu.2021.742941
- 699 Wang Y, Guga S, Wu K, Khaw Z, Tzoumkas K, Tombleson P, Comeau ME, Langefeld CD,  
700 Cunninghame Graham DS, Morris DL, Vyse TJ (2022) COVID-19 and systemic lupus  
701 erythematosus genetics: A balance between autoimmune disease risk and protection against  
702 infection. *PLoS Genet* 18: e1010253. doi: 10.1371/journal.pgen.1010253
- 703 Wu L, Zhu J, Liu D, Sun Y, Wu C (2021) An integrative multiomics analysis identifies putative causal  
704 genes for COVID-19 severity. *Genet Med* 23: 2076-2086. doi: 10.1038/s41436-021-01243-5
- 705 Yoshiji S, Butler-Laporte G, Lu T, Willett JDS, Su CY, Nakanishi T, Morrison DR, Chen Y, Liang K,  
706 Hultstrom M, Ilboudo Y, Afrasiabi Z, Lan S, Duggan N, DeLuca C, Vaezi M, Tselios C, Xue X,  
707 Bouab M, Shi F, Laurent L, Munter HM, Afilalo M, Afilalo J, Mooser V, Timpson NJ, Zeberg H,  
708 Zhou S, Forgetta V, Farjoun Y, Richards JB (2023) Proteome-wide Mendelian randomization  
709 implicates nephronectin as an actionable mediator of the effect of obesity on COVID-19 severity.  
710 *Nat Metab* 5: 248-264. doi: 10.1038/s42255-023-00742-w
- 711 Zheng J, Haberland V, Baird D, Walker V, Haycock PC, Hurler MR, Gutteridge A, Erola P, Liu Y, Luo S,  
712 Robinson J, Richardson TG, Staley JR, Elsworth B, Burgess S, Sun BB, Danesh J, Runz H,  
713 Maranville JC, Martin HM, Yarmolinsky J, Laurin C, Holmes MV, Liu JZ, Estrada K, Santos R,  
714 McCarthy L, Waterworth D, Nelson MR, Smith GD, Butterworth AS, Hemani G, Scott RA,



*Colocalization of expression transcripts with COVID-19 outcomes is dependent on cell-type and cell-state.*

715 Gaunt TR (2020) Phenome-wide Mendelian randomization mapping the influence of the plasma  
716 proteome on complex diseases. Nat Genet 52: 1122-1131. doi: 10.1038/s41588-020-0682-6  
717 Zhou S, Butler-Laporte G, Nakanishi T, Morrison DR, Afilalo J, Afilalo M, Laurent L, Pietzner M,  
718 Kerrison N, Zhao K, Brunet-Ratnasingham E, Henry D, Kimchi N, Afrasiabi Z, Rezk N, Bouab  
719 M, Petitjean L, Guzman C, Xue X, Tselios C, Vulesevic B, Adeleye O, Abdullah T, Almamlouk  
720 N, Chen Y, Chasse M, Durand M, Paterson C, Normark J, Frithiof R, Lipcsey M, Hultstrom M,  
721 Greenwood CMT, Zeberg H, Langenberg C, Thysell E, Pollak M, Mooser V, Forgetta V,  
722 Kaufmann DE, Richards JB (2021) A Neanderthal OAS1 isoform protects individuals of  
723 European ancestry against COVID-19 susceptibility and severity. Nat Med 27: 659-667. doi:  
724 10.1038/s41591-021-01281-1  
725
